# Supplementary material for: On solvated tin(iv) ions and the coordination chemistry of high-valent d10 metal ions
Source: Royal Society of Chemistry journal article supplement (doi:10.1039/c9dt01097a), 2019-01-01

**On solvated tin(IV) ions and the coordination chemistry of high-valent  $d^{10}$  metal ions**

Daniel Lundberg\* and Ingmar Persson

**Electronic Supplementary Information**

**Table S1.** Summary of bond distances in stannate(IV) and tin(IV) oxide compounds with the composition *i*)  $[\text{Sn}(\text{OH})_6]^{2-}$ , *ii*)  $(\text{SnO}_3^{2-})_n$  and  $(\text{SnO}_4^{4-})_n$ , *iii*) tin(IV) oxides, and *iv*) tin(IV) complexes with organic oxygen donor ligands. Red-marked references are considered outliers (including those with deviating chemical composition, and/or erroneous or incorrectly determined structures), and have not been included in the mean values. In addition, temperature/pressure modification measurements often yield multiple structure refcodes, where only one representative structure has been chosen to not skew mean values. Refcode given in numbers (ICSD; ref. 2) and letters (CSD; ref. 3).

***i*)  $[\text{Sn}(\text{OH})_6]^{2-}$**

Ref. code

|        |         |                                                                                                                                                                                                                                                                                                                                                    |
|--------|---------|----------------------------------------------------------------------------------------------------------------------------------------------------------------------------------------------------------------------------------------------------------------------------------------------------------------------------------------------------|
| 5120   | 1.973 Å | C. R. Ross, L. R. Bernstein and G. A. Waychunas, <i>Am. Mineralog.</i> 1988, <b>73</b> , 657-661. $(\text{Mn}_{0.94}/\text{Fe}_{0.06})[\text{Sn}_{0.98}/\text{Si}_{0.01}/\text{Al}_{0.01}(\text{OH})_6]$                                                                                                                                           |
| 27147  | 1.976 Å | C. O. Bjoerling, <i>Am. J. Sci. Ser. 5</i> 1928, <b>15</b> , 297-302. $\text{K}_2[\text{Sn}(\text{OH})_6]$ .                                                                                                                                                                                                                                       |
| 27767  | 2.003 Å | C. Cohen-Addad, <i>Bull. Soc. Fr. Mineral. Cristall.</i> 1968, <b>91</b> , 315-324. $\text{Zn}[\text{Sn}(\text{OH})_6]$ .                                                                                                                                                                                                                          |
| 25822  | 2.027 Å | H. Strunz and B. Contag, <i>Acta Crystallogr.</i> 1960, <b>13</b> , 601-603. $\text{Mn}[\text{Sn}(\text{OH})_6]$ .                                                                                                                                                                                                                                 |
| 25821  | 2.029 Å | H. Strunz and B. Contag, <i>Acta Crystallogr.</i> 1960, <b>13</b> , 601-603. $\text{Fe}[\text{Sn}(\text{OH})_6]$ .                                                                                                                                                                                                                                 |
| 25823  | 2.032 Å | H. Strunz and B. Contag, <i>Acta Crystallogr.</i> 1960, <b>13</b> , 601-603. $\text{Co}[\text{Sn}(\text{OH})_6]$ .                                                                                                                                                                                                                                 |
| 25825  | 2.032 Å | H. Strunz and B. Contag, <i>Acta Crystallogr.</i> 1960, <b>13</b> , 601-603. $\text{Ca}[\text{Sn}(\text{OH})_6]$ .                                                                                                                                                                                                                                 |
| 27146  | 2.032 Å | H. Strunz and B. Contag, <i>Acta Crystallogr.</i> 1960, <b>13</b> , 601-603. $\text{Na}_2[\text{Sn}(\text{OH})_6]$ .                                                                                                                                                                                                                               |
| 25824  | 2.033 Å | H. Strunz and B. Contag, <i>Acta Crystallogr.</i> 1960, <b>13</b> , 601-603. $\text{Mg}[\text{Sn}(\text{OH})_6]$ .                                                                                                                                                                                                                                 |
| YORJOG | 2.043 Å | Y. Zhiliang R. Mockel, J. Bergunde and S. Dehnen, <i>Chem.-Eur. J.</i> 2014, <b>20</b> , 13491-13496. $[\text{C}_{54}\text{H}_{75}\text{Cl}_6\text{Fe}_3\text{N}_6\text{O}_6\text{Sn}_4][\text{C}_6\text{H}_5\text{O}_3\text{Se}] \cdot 4 \text{CHCl}_3$ . <i>[Sn(<math>\mu</math>-OH)<math>_6</math>]-moeity in larger framework.</i>             |
| YORJIA | 2.044 Å | Y. Zhiliang, R. Mockel, J. Bergunde and S. Dehnen, <i>Chem.-Eur. J.</i> 2014, <b>20</b> , 13491-13496. $[\text{C}_{54}\text{H}_{75}\text{Cl}_6\text{Fe}_3\text{N}_6\text{O}_6\text{Sn}_4][\text{SnCl}_3] \cdot \text{CHCl}_3 \cdot \frac{1}{2}\text{C}_2\text{Cl}_4$ . <i>[Sn(<math>\mu</math>-OH)<math>_6</math>]-moeity in larger framework.</i> |
| MAHQAP | 2.045 Å | L. Plasseraud, H. Cattey and P. Richard, <i>Z.Naturforsch.,B:Chem.Sci.</i> 2010, <b>65</b> , 1293-1300. $[\text{C}_{72}\text{H}_{96}\text{F}_6\text{O}_{32}\text{S}_2\text{Sn}_{11}][\text{CF}_3\text{O}_3\text{S}]_6 \cdot 2\text{CH}_2\text{Cl}_2$ . <i>[Sn(<math>\mu</math>-OH)<math>_6</math>]-moeity in larger framework.</i>                 |
| 27764  | 2.048 Å | C. Cohen-Addad, <i>Bull. Soc. Fr. Mineral. Cristall.</i> 1968, <b>91</b> , 315-324. $\text{Ca}[\text{Sn}(\text{OH})_6]$ .                                                                                                                                                                                                                          |
| 280588 | 2.052 Å | S.-F. Yang, P. Y. Zavalii and M. S. Whittingham, <i>Acta Crystallogr., Sect. C</i> 2001, <b>57</b> , 228-229. $\text{Li}_2[\text{Sn}(\text{OH})_6]$ .                                                                                                                                                                                              |
| 420543 | 2.055 Å | S. Kamaha and H. Reuter, <i>Z. Anorg. Allg. Chem.</i> 2009, <b>635</b> , 2058-2064. $\text{Ba}[\text{Sn}(\text{OH})_6] \cdot 5\text{H}_2\text{O}$ .                                                                                                                                                                                                |
| 91102  | 2.059 Å | M.-M. Wu, X.-L. Li, G.-P. Shen, J. Li, R.-R. Xu and D. M. Proserpio, <i>J. Solid State Chem.</i> 2000, <b>151</b> , 56-60. $\text{Sr}_2[\text{Sn}(\text{OH})_6](\text{OH})_2$ .                                                                                                                                                                    |
| 103    | 2.060 Å | E. Dubler, R. Hess and H. R. Oswald, <i>Z. Anorg. Allg. Chem.</i> 1976, <b>421</b> , 61-70. $[\text{Cu}(\text{NH}_3)_2][\text{Sn}(\text{OH})_6]$ .                                                                                                                                                                                                 |

|             |                              |                                                                                                                                                                                                           |
|-------------|------------------------------|-----------------------------------------------------------------------------------------------------------------------------------------------------------------------------------------------------------|
| 85426       | 2.060 Å                      | H. Reuter and G. Bargon, <i>Z. Anorg. Allg. Chem.</i> 1997, <b>623</b> , 1978-1982. Li <sub>2</sub> [Sn(OH) <sub>6</sub> ]·2H <sub>2</sub> O.                                                             |
| 92465       | 2.060 Å                      | H. Jacobs and R. Stahl, <i>Z. Anorg. Allgem. Chem.</i> 2000, <b>626</b> , 1863-1866. Na <sub>2</sub> [Sn(OH) <sub>6</sub> ]                                                                               |
| 85487       | 2.061 Å                      | K. Nakata and H. Toyooka, <i>Osaka Kyoiku Daigaku Kiyo, Dai-3-bumon</i> 1997, <b>46</b> , 57-65. Li <sub>2</sub> [Sn(OH) <sub>6</sub> ].                                                                  |
| 188663      | 2.064 Å                      | S. Kamaha and H. Reuter, <i>Acta Crystallogr., Sect. E</i> 2013, <b>69</b> , i25-i25. Li <sub>2</sub> [Sn(OH) <sub>6</sub> ]·2H <sub>2</sub> O                                                            |
| 94535       | 2.068 Å                      | S. I. Troyanov, A. V. Kostrikin, F. M. Spiridonov, I. V. Lin'ko, A. I. Ezhov, S. V. Martynova and B. E. Zaitsev, <i>Zh. Neorg. Khim.</i> 2001, <b>46</b> , 572-576. K <sub>2</sub> [Sn(OH) <sub>6</sub> ] |
| 92464       | 2.071 Å                      | H. Jacobs and R. Stahl, <i>Anorg. Allgem. Chem.</i> 2000, <b>626</b> , 1863-1866. Na <sub>2</sub> [Sn(OH) <sub>6</sub> ]                                                                                  |
| 194         | 2.091 Å                      | I. Morgenstern Badarau, <i>J Solid State Chem.</i> 1976, <b>17</b> , 399-406. Cu[Sn(OH) <sub>6</sub> ].                                                                                                   |
| 15313       | 2.108 Å                      | A. N. Christensen and R. G. Hazell, <i>Acta Chem. Scand.</i> 1969, <b>23</b> , 1219-1224. Mn[Sn(OH) <sub>6</sub> ].                                                                                       |
| 85488       | 2.110 Å                      | K. Nakata and H. Toyooka, <i>Mem. Osaka Kyoiku Univ. Ser. III Nat. Sci. Appl. Sci.</i> 1997, <b>46</b> , 57-65. Li <sub>2</sub> [Sn(OH) <sub>6</sub> ].                                                   |
| 76927       | 2.171 Å                      | L. C. Basciano, R. T. Peterson, P. L. Roeder and I. Swainson, <i>Can. Mineral.</i> 1998, <b>36</b> , 1203-1210. Mg[Sn(OH) <sub>6</sub> ].                                                                 |
| 76928       | 2.181 Å                      | L. C. Basciano, R. T. Peterson, P. L. Roeder and I. Swainson, <i>Can. Mineral.</i> 1998, <b>36</b> , 1203-1210. Mn[Sn(OH) <sub>6</sub> ].                                                                 |
| <b>Mean</b> | <b>2.049 Å/20 structures</b> |                                                                                                                                                                                                           |

### ii<sub>3</sub>) [SnO<sub>3</sub>]<sup>2-</sup>

#### *Chain structures, six-coordinated*

|         |         |                                                                                                                                                                              |
|---------|---------|------------------------------------------------------------------------------------------------------------------------------------------------------------------------------|
| 56095   | 1.960 Å | J. L. Hodeau, M. Marezio, A. Santoro and R. S. Roth, <i>J. Solid State Chem.</i> 1982, <b>45</b> , 170-179. CaSnO <sub>3</sub>                                               |
| 27047   | 2.013 Å | H. D. Megaw, <i>Proc. Phys. Soc., London</i> 1946, <b>58</b> , 133-152. SrSnO <sub>3</sub>                                                                                   |
| 261491  | 2.032 Å | E. Moreira, J. M. Henriques, D. L. Azevedo, E. W. S. Caetano, V. N. Freire and E. L. Albuquerque, <i>J. Solid State Chem.</i> 2011, <b>174</b> , 921-928. SrSnO <sub>3</sub> |
| 2373    | 2.039 Å | B. Durand and H. Loiseleur, <i>J. Appl. Crystallog.</i> 1978, <b>11</b> , 289-290. CaSnO <sub>3</sub>                                                                        |
| 29204   | 2.039 Å | B. Durand, M. Diot and P. Mollard, <i>Ann. Chim. (Paris)</i> 1979, <b>4</b> , 559-607. CaSnO <sub>3</sub>                                                                    |
| 97432   | 2.039 Å | P. Schmid-Beurmann, V. Thangadurai and W. Weppner, <i>J. Solid State Chem.</i> 2003, <b>174</b> , 392-402. SrSnO <sub>3</sub>                                                |
| 90846   | 2.049 Å | M. A. Green, K. Prassides, P. Day and D.A. Neumann, <i>Int. J. Inorg. Mater.</i> 2000, <b>2</b> , 35-41. SrSnO <sub>3</sub>                                                  |
| 153530* | 2.050 Å | M. Glerup, K. S. Knight and F. W. Poulsen, <i>Mater. Res. Bull.</i> 2005, <b>40</b> , 507-520. SrSnO <sub>3</sub>                                                            |
| 90845   | 2.051 Å | M. A. Green, K. Prassides, P. Day and D.A. Neumann, <i>Int. J. Inorg. Mater.</i> 2000, <b>2</b> , 35-41. SrSnO <sub>3</sub>                                                  |
| 245943  | 2.051 Å | Y. Inaguma, M. Yoshida and T. Katsumata, <i>J. Am. Chem. Soc.</i> 2008, <b>130</b> , 6704-6705. ZnSnO <sub>3</sub>                                                           |
| 27049   | 2.054 Å | H. D. Megaw, <i>Proc. Phys. Soc., London</i> 1946, <b>58</b> , 133-152. BaSnO <sub>3</sub>                                                                                   |

|             |                              |                                                                                                                                                                                                     |
|-------------|------------------------------|-----------------------------------------------------------------------------------------------------------------------------------------------------------------------------------------------------|
| 180138      | 2.055 Å                      | A. S. Deepa, S. Vidya, P. C. Manu, S. Solomon, A. John and J. K. Thomas, <i>J. Alloys Compd.</i> 2011, <b>509</b> , 1830-1835. BaSnO <sub>3</sub>                                                   |
| 151591*     | 2.056 Å                      | J. Zhao, N. L. Ross and R. J. Angel, <i>Phys. Chem. Minerals</i> 2004, <b>31</b> , 299-305. CaSnO <sub>3</sub>                                                                                      |
| 161783      | 2.057 Å                      | S. Aleksovska, S. Dimitrovska and I. Kuzmanovski, <i>Acta Chim. Slov.</i> 2007, <b>54</b> , 574-582. SrSnO <sub>3</sub>                                                                             |
| 165167      | 2.057 Å                      | H. Mizoguchi, H. W. Eng and P. M. Woodward, <i>Inorg. Chem.</i> 2004, <b>43</b> , 1667-1680. CdSnO <sub>3</sub>                                                                                     |
| 59161       | 2.060 Å                      | M. Vallet Regi, J. M. Gonzalez Calbet, M. A. Alario-Franco and A. Vegas, <i>Acta Crystallogr., Sect. C</i> 1986, <b>42</b> , 167-172. SrSnO <sub>3</sub>                                            |
| 59160       | 2.061 Å                      | M. Vallet Regi, J. M. Gonzalez Calbet, M. A. Alario-Franco and A. Vegas, <i>Acta Crystallogr., Sect. C</i> 1986, <b>42</b> , 167-172. CaSnO <sub>3</sub>                                            |
| 43138       | 2.062 Å                      | Y. Hinatsu, <i>J. Solid State Chem.</i> 1996, <b>122</b> , 384-389. BaSnO <sub>3</sub>                                                                                                              |
| 260029      | 2.062 Å                      | M. Yoshida, T. Katsumata and Y. Inaguma, <i>Y. Inorg. Chem.</i> 2008, <b>47</b> , 6296-6302 HgSnO <sub>3</sub>                                                                                      |
| 21053       | 2.064 Å                      | G. Lang, <i>Z. Anorg. Allg. Chem.</i> 1966, <b>348</b> , 246-256. Li <sub>2</sub> SnO <sub>3</sub>                                                                                                  |
| 261492      | 2.064 Å                      | E. Moreira, J. M. Henriques, D. L. Azevedo, E. W. S. Caetano, V. N. Freire and E. L. Albuquerque, <i>J. Solid State Chem.</i> 2011, <b>174</b> , 921-928. SrSnO <sub>3</sub>                        |
| 21032       | 2.072 Å                      | G. Kreuzburg, F. Stewner and R. Hoppe, <i>Z. Anorg. Allg. Chem.</i> 1970, <b>379</b> , 242-254. Li <sub>2</sub> SnO <sub>3</sub>                                                                    |
| 89838       | 2.074 Å                      | T. Oku, A. Carlsson, J.-O. Bovin, C. Svensson, L. R. Wallenberg, C. Linke, and M. Jansen, <i>Acta Crystallogr., Sect. B</i> 2000, <b>56</b> , 363-368. Ag <sub>2</sub> SnO <sub>3</sub>             |
| 407237      | 2.074 Å                      | M. Jansen and C. Linke, <i>Anorg. Allg. Chem.</i> 1997, <b>623</b> , 1441-1446. Ag <sub>2</sub> SnO <sub>3</sub>                                                                                    |
| 180402*     | 2.075 Å                      | P. D. Sesion, Jr., J. M. Henriques, C. A. Barboza, E. L. Albuquerque, V. N. Freire and E. W. S. Caetano, <i>J. Phys.: Condensed Matter</i> 2010, <b>22</b> , 435801-1-435801-13. CdSnO <sub>3</sub> |
| 50404       | 2.085 Å                      | D. Kovacheva and K. Petrov, <i>Solid State Ionics</i> 1998, <b>109</b> , 327-332. ZnSnO <sub>3</sub>                                                                                                |
| 29203       | 2.088 Å                      | B. Durand, M. Diot and P. Mollard, <i>Ann. Chim. (Paris)</i> 1979, <b>4</b> , 559-607. MnSnO <sub>3</sub>                                                                                           |
| 165122      | 2.105 Å                      | W. Hai, H. Haitao and W. Biao <i>Solid State Commun.</i> 2009, <b>149</b> , 1849-1852. ZnSnO <sub>3</sub>                                                                                           |
| 6325        | 2.111 Å                      | A. Verbaere, M. Dion and M. Tournoux, <i>J. Solid State Chem.</i> 1974, <b>11</b> , 184-189. Tl <sub>2</sub> SnO <sub>3</sub>                                                                       |
| 24561       | 2.149 Å                      | J. Zhao, N. L. Ross, R. J. Angel, <i>Phys. Chem. Miner.</i> , 2004, <b>31</b> , 299-305. CaSnO <sub>3</sub>                                                                                         |
| <b>Mean</b> | <b>2.056 Å/23 structures</b> |                                                                                                                                                                                                     |

\* = representative structure of multiple temperature/pressure modifications

## ii.) [SnO<sub>4</sub>]<sup>4-</sup>

### Isolated four-coordinated

|       |         |                                                                                                                   |
|-------|---------|-------------------------------------------------------------------------------------------------------------------|
| 65970 | 1.955 Å | K. Bernet and R. Hoppe, <i>Z. Anorg. Allg. Chem.</i> 1990, <b>587</b> , 145-156. Cs <sub>4</sub> SnO <sub>4</sub> |
|-------|---------|-------------------------------------------------------------------------------------------------------------------|

|             |                             |                                                                                                                                          |
|-------------|-----------------------------|------------------------------------------------------------------------------------------------------------------------------------------|
| 202818      | 1.955 Å                     | K. Bernet and R. Hoppe, <i>Eur. J. Solid State Inorg. Chem.</i> 1988, <b>25</b> , 119-134. Na <sub>4</sub> SnO <sub>4</sub>              |
| 158         | 1.956 Å                     | R. Marchand, Y. Piffard and M. Tournoux, <i>Acta Crystallogr., Sect. B</i> 1975, <b>31</b> , 511-514. K <sub>4</sub> [SnO <sub>4</sub> ] |
| 280293      | 1.958 Å                     | C. Hoch and C. Roehr, <i>Acta Crystallogr., Sect. C</i> 2000, <b>56</b> , 136-137. Rb <sub>4</sub> SnO <sub>4</sub>                      |
| 40217       | 1.959 Å                     | K. Bernet and R. Hoppe, <i>Z. Anorg. Allg. Chem.</i> 1989, <b>571</b> , 101-112. RbNa <sub>3</sub> SnO <sub>4</sub>                      |
| <b>Mean</b> | <b>1.957 Å/5 structures</b> |                                                                                                                                          |

*Mixed four- and six-coordinated*

|       |                 |                                                                                                                                                                                                                                       |
|-------|-----------------|---------------------------------------------------------------------------------------------------------------------------------------------------------------------------------------------------------------------------------------|
| 24123 | 1.976 + 2.102 Å | P. Poix, <i>Ann. Chim. (Paris)</i> 1964, 261-285. CoMgSnO <sub>4</sub>                                                                                                                                                                |
| 28239 | 2.153 + 2.095 Å | J. Choisnet, A. Deschanvres and B. Raveau, <i>Comptes Rendus Hebdomadaires des Seances de l'Academie des Sciences, Serie C, Sciences Chimiques</i> 1968, <b>266</b> , 543-545. (Zn <sub>1.2</sub> Cd <sub>0.8</sub> )SnO <sub>4</sub> |

*Chain structures, six-coordinated*

|         |         |                                                                                                                                                                                                                 |
|---------|---------|-----------------------------------------------------------------------------------------------------------------------------------------------------------------------------------------------------------------|
| 9010    | 2.029 Å | M. Troemel, <i>Z. Anorg. Allg. Chem.</i> 1969, <b>371</b> , 237-247. Cd <sub>2</sub> SnO <sub>4</sub>                                                                                                           |
| 24234   | 2.032 Å | T. F. W. Barth and E. Posnjak, <i>Z. Kristallogr., Kristallgeom., Kristallphys., Kristallchem.</i> 1932, <b>82</b> , 325-341. Zn <sub>2</sub> SnO <sub>4</sub>                                                  |
| 84245   | 2.034 Å | B. J. Kennedy, <i>Aust. J. Chem.</i> 1997, <b>50</b> , 917-919. Sr <sub>2</sub> SnO <sub>4</sub>                                                                                                                |
| 81852   | 2.037 Å | M. A. Green, K. Prassides, P. Day and J. K. Stalick, <i>J. Chem. Soc., Faraday Trans.</i> 1996, <b>92</b> , 2155-2159. Sr <sub>2</sub> SnO <sub>4</sub>                                                         |
| 81851   | 2.039 Å | M. A. Green, K. Prassides, P. Day and J. K. Stalick, <i>J. Chem. Soc., Faraday Trans.</i> 1996, <b>92</b> , 2155-2159. Sr <sub>2</sub> SnO <sub>4</sub>                                                         |
| 28235   | 2.041 Å | J. Choisnet, A. Deschanvres and B. Raveau, <i>Comptes Rendus Hebdomadaires des Seances de l'Academie des Sciences, Serie C, Sciences Chimiques</i> 1968, <b>266</b> , 543-545. Zn <sub>2</sub> SnO <sub>4</sub> |
| 150385* | 2.041 Å | W. T. Fu, D. Visser, K. S. Knight and D. J. W. Ijdo, <i>J. Solid State Chem.</i> 2004, <b>177</b> , 4081-4086. Sr <sub>2</sub> SnO <sub>4</sub>                                                                 |
| 59760*  | 2.043 Å | W. T. Fu, D. Visser and D. J. W. Ijdo, <i>J. Solid State Chem.</i> 2002, <b>169</b> , 208-213. Sr <sub>2</sub> SnO <sub>4</sub>                                                                                 |
| 35728   | 2.049 Å | P. Lacorre, M. Hervieu, J. Pannetier, J. Choisnet and B. Raveau, <i>J. Solid State Chem.</i> 1983, <b>50</b> , 196-203. LiFeSnO <sub>4</sub>                                                                    |
| 35726   | 2.052 Å | P. Lacorre, M. Hervieu, J. Pannetier, J. Choisnet and B. Raveau, <i>J. Solid State Chem.</i> 1983, <b>50</b> , 196-203. LiFeSnO <sub>4</sub>                                                                    |
| 27115   | 2.062 Å | R. Weiss and R. Faivre, <i>Comptes Rendus Hebdomadaires des Seances de l'Academie des Sciences</i> 1959, <b>248</b> , 106-108. Ba <sub>2</sub> SnO <sub>4</sub>                                                 |
| 84246   | 2.065 Å | B. J. Kennedy, <i>Aust. J. Chem.</i> 1997, <b>50</b> , 917-919. Ba <sub>2</sub> SnO <sub>4</sub>                                                                                                                |
| 81849   | 2.066 Å | M. A. Green, K. Prassides, P. Day and J. K. Stalick, <i>J. Chem. Soc., Faraday Trans.</i> 1996, <b>92</b> , 2155-2159. Ba <sub>2</sub> SnO <sub>4</sub>                                                         |
| 81850   | 2.069 Å | M. A. Green, K. Prassides, P. Day and J. K. Stalick, <i>J. Chem. Soc., Faraday Trans.</i> 1996, <b>92</b> , 2155-2159. Ba <sub>2</sub> SnO <sub>4</sub>                                                         |
| 69297   | 2.069 Å | M. E. Bowden and C. M. Cardile, <i>Powder Diffraction</i> 1990, <b>5</b> , 36-40. Cd <sub>2</sub> SnO <sub>4</sub>                                                                                              |

|             |                              |                                                                                                                                                                                                            |
|-------------|------------------------------|------------------------------------------------------------------------------------------------------------------------------------------------------------------------------------------------------------|
| 28199       | 2.076 Å                      | V. A. Bokov, G. V. Novikov, O. B. Proskuryakov, Y. G. Saksonov, V. A. Trukhtanov and S. I. Yushchuk, <i>Fizika Tverdogo Tela (Leningrad)</i> 1968, <b>10</b> , 1080-1084. Mg <sub>2</sub> SnO <sub>4</sub> |
| 24127       | 2.077 Å                      | P. Poix, <i>Ann. Chim. (Paris)</i> 1964, 261-285. Mg <sub>2</sub> SnO <sub>4</sub>                                                                                                                         |
| 69296       | 2.088 Å                      | M. E. Bowden and C. M. Cardile, <i>Powder Diffraction</i> 1990, <b>5</b> , 36-40. Cd <sub>2</sub> SnO <sub>4</sub>                                                                                         |
| 187742      | 2.094 Å                      | T. Ishigaki, A. Torisaka, K. Nomizu, P. Madhusudan, K. Uematsu, K. Toda and M. Sato, <i>Dalton Trans.</i> 2013, <b>42</b> , 4781-4785. Ca <sub>2</sub> SnO <sub>4</sub>                                    |
| 193154      | 2.095 Å                      | K. Jeyadheepan and C. Sanjeeviraja, <i>J. Chem.</i> 2014, <b>7</b> , 245918/1-6. Zn <sub>2</sub> SnO <sub>4</sub> .                                                                                        |
| 173626      | 2.098 Å                      | H. Yamane, Y. Kaminaga, S. Abe and T. Yamada, <i>J. Solid State Chem.</i> 2008, <b>181</b> , 2559-2564. Ca <sub>2</sub> SnO <sub>4</sub>                                                                   |
| 9011        | 2.101 Å                      | M. Troemel, <i>Z. Anorg. Allg. Chem.</i> 1969, <b>371</b> , 237-247. Ca <sub>2</sub> SnO <sub>4</sub>                                                                                                      |
| 28491       | 2.151 Å                      | M. Nogues and P. Poix, <i>Ann. Chim. (Paris)</i> 1968, 335-345. Mn <sub>2</sub> SnO <sub>4</sub>                                                                                                           |
| 69299       | 2.241 Å                      | M. E. Bowden and C. M. Cardile, <i>Powder Diffraction</i> 1990, <b>5</b> , 36-40. Cd <sub>2</sub> SnO <sub>4</sub>                                                                                         |
| 69298       | 2.244 Å                      | M. E. Bowden and C. M. Cardile, <i>Powder Diffraction</i> 1990, <b>5</b> , 36-40. Cd <sub>2</sub> SnO <sub>4</sub>                                                                                         |
| <b>Mean</b> | <b>2.060 Å/21 structures</b> |                                                                                                                                                                                                            |

\* = representative structure of multiple temperature/pressure modifications

#### *Hexanitratotin(IV) complex*

|        |         |                                                                                                                                                                                                                                                                 |
|--------|---------|-----------------------------------------------------------------------------------------------------------------------------------------------------------------------------------------------------------------------------------------------------------------|
| EXEHAS | 2.072 Å | P. Portius, B. Peerless, M. Davis and R. Campbell, <i>Inorg. Chem.</i> 2016, <b>55</b> , 8976-8984. 2[(C <sub>6</sub> H <sub>5</sub> ) <sub>3</sub> PNP(C <sub>6</sub> H <sub>5</sub> ) <sub>3</sub> ][Sn(NO <sub>3</sub> ) <sub>6</sub> ]·2 CH <sub>3</sub> CN |
|--------|---------|-----------------------------------------------------------------------------------------------------------------------------------------------------------------------------------------------------------------------------------------------------------------|

#### **iii) SnO<sub>2</sub>**

|        |         |                                                                                                                                               |
|--------|---------|-----------------------------------------------------------------------------------------------------------------------------------------------|
| 169032 | 2.033 Å | A. Gupta, A. Kumar, M. S. Hegde and U. V. Waghmare, <i>J. Chem. Phys.</i> 2010, <b>132</b> , 194702-1-194702-8.                               |
| 181276 | 2.038 Å | Z. Bo, L. C. Mei, L. M. Bang, C. X. Rong, Z. Jun, J. G. Fu, <i>Phys. B: Condensed Matter</i> 2011, <b>406</b> , 3508-3513.                    |
| 157449 | 2.048 Å | L. Gracia, A. Beltran and J. Andres, <i>J. Phys. Chem. B</i> 2007, <b>111</b> , 6479-6485.                                                    |
| 90611  | 2.050 Å | M. Klementova, M. Rieder and Z. Weiss, <i>Int. J. Inorg. Mater.</i> 2000, <b>45</b> , 155-157.                                                |
| 157448 | 2.050 Å | L. Gracia, A. Beltran and J. Andres, <i>J. Phys. Chem. B</i> 2007, <b>111</b> , 6479-6485.                                                    |
| 169033 | 2.050 Å | A. Gupta, A. Kumar, M. S. Hegde and U. V. Waghmare, <i>J. Chem. Phys.</i> 2010, <b>132</b> , 194702-1-194702-8.                               |
| 154960 | 2.051 Å | B. Grzeta, E. Tkalcec, C. Goebbert, M. Takeda, M. Takahashi, K. Nomura and M. Jaksic, <i>J. Phys. Chem. Solids</i> 2002, <b>63</b> , 765-772. |

|             |                              |                                                                                                                                                            |
|-------------|------------------------------|------------------------------------------------------------------------------------------------------------------------------------------------------------|
| 56671       | 2.053 Å                      | J. Haines and J. M. Leger, <i>Phys. Rev. B</i> 1997, <b>55</b> , 11144-11154                                                                               |
| 16635       | 2.053 Å                      | W. H. Baur, <i>Acta Crystallogr.</i> 1956, <b>9</b> , 515-520.                                                                                             |
| 160667      | 2.053 Å                      | T. Maekawa, C. Minagoshi, S. Nakamura, K. Nomura and H. Kageyama, <i>Chem. Sensors, Jpn.</i> 2008, <b>24</b> , 19-21                                       |
| 9163        | 2.054 Å                      | W. H. Baur and A. A. Khan, <i>Acta Crystallogr., Sect. B</i> 1971, <b>27</b> , 2133-2139.                                                                  |
| 39173       | 2.054 Å                      | H. Seki, N. Ishizawa, N. Mizutani and M. Kato, <i>J. Ceram. Assoc. Jpn.</i> 1984, <b>92</b> , 219-223; <i>Powder Diffraction</i> 1989, <b>4</b> , 156-160. |
| 647469      | 2.054 Å                      | Z. Bo, L. C. Mei, L. M. Bang, C. X. Rong, Z. Jun, J. G. Fu, <i>Phys. B: Condensed Matter</i> 2011, <b>406</b> , 3508-3513.                                 |
| 84576       | 2.055 Å                      | A. A. Bolzan, C. Fong, B. J. Kennedy and C. J. Howard, <i>Acta Crystallogr., Sect. B</i> 1997, <b>53</b> , 373-380.                                        |
| 92552       | 2.055 Å                      | T. Yamanaka, R. Kurashima and J. Mimaki, <i>Z. Kristallogr.</i> 2000, <b>215</b> , 424-428.                                                                |
| 91517       | 2.057 Å                      | Y.-I. Kim, M.-J. Jung and K. H. Kim, <i>Korean J. Ceram.</i> 2000, <b>6</b> , 354-358.                                                                     |
| 157450      | 2.058 Å                      | L. Gracia, A. Beltran and J. Andres, <i>J. Phys. Chem. B</i> 2007, <b>111</b> , 6479-6485.                                                                 |
| 157451      | 2.068 Å                      | L. Gracia, A. Beltran and J. Andres, <i>J. Phys. Chem. B</i> 2007, <b>111</b> , 6479-6485.                                                                 |
| 62199       | 2.092 Å                      | E. Müller, <i>Acta Crystallogr., Sect. B</i> 1984, <b>40</b> , 359-363.                                                                                    |
| <b>Mean</b> | <b>2.052 Å/18 structures</b> |                                                                                                                                                            |

#### iv) Tin(IV) complexes containing anionic organic ligands

##### Four-coordinate structures

VISKIR 1.948 Å M. J. Hampden-Smith, T. A. Wark, A. Rheingold and J. C. Huffman, *Can. J. Chem.* 1991, **69**, 121-129. Sn(C<sub>4</sub>H<sub>9</sub>O)<sub>4</sub>

##### Five-coordinate structures

SIHNEC 2.011 Å M. Veith and M. Reimers, *Chem. Ber.* 1990, **123**, 1941-1944. (C<sub>40</sub>H<sub>90</sub>K<sub>2</sub>O<sub>10</sub>Sn<sub>2</sub>)<sub>n</sub> n(C<sub>7</sub>H<sub>8</sub>)

EKOBEM 2.146 Å B. Ruan, Y. Tian, H. Zhou, J. Wu, R. Hu, C. Zhu, J. Yang and H. Zhu *Inorg. Chim. Acta* 2011, **365**, 302-308.

##### Six-coordinate structures (selected, excluding those with Sn-O-Sn bonds)

RIZREX 2.019 Å B. Jirjahn, H. Hildebrandt and G. Heller, *Z. Naturforsch., Teil B* 1997, **52**, 95-101.

DEPMET 2.030 Å M. C. Barry, C. M. Lieberman, Z. Wei, R. Clerac, A. S. Filatov and E. V. Dikarev, *Inorg. Chem.* 2018, **57**, 2308-2313.

DEPMOD 2.031 Å M. C. Barry, C. M. Lieberman, Z. Wei, R. Clerac, A. S. Filatov and E. V. Dikarev, *Inorg. Chem.* 2018, **57**, 2308-2313.

DEPMUJ 2.031 Å M. C. Barry, C. M. Lieberman, Z. Wei, R. Clerac, A. S. Filatov and E. V. Dikarev, *Inorg. Chem.* 2018, **57**, 2308-2313.

YUNDAM 2.038 Å I. Abrahams, M. Motevalli, S. A. A. Shah and A. C. Sullivan, *J. Organomet. Chem.* 1995, **492**, 99-104.

|        |         |                                                                                                                                                                   |
|--------|---------|-------------------------------------------------------------------------------------------------------------------------------------------------------------------|
| RAWWOC | 2.043 Å | S. N. Brown, E. T. Chu, M. W. Hull and B. C. Noll, <i>J. Am. Chem. Soc.</i> 2005, <b>127</b> , 16010-16011.                                                       |
| IQIPED | 2.044 Å | L. Jager, V. Lorenz, T. Muller, H.-P. Abicht, M. Rossel and H. Gorls, <i>Z. Anorg. Allg. Chem.</i> <b>2004</b> , 630, 189-195.                                    |
| VOHTIX | 2.044 Å | G. A. Seisenbaeva, S. D. Topel and V. G. Kessler, <i>Polyhedron</i> <b>2014</b> , 81, 21-26.                                                                      |
| AFEXEQ | 2.045 Å | E. E. Martsinko, I. K. Minacheva, E. A. Chebanenko, I. I. Seifullina, V. S. Sergienko and A. V. Churakov, <i>Zh. Neorg. Khim.</i> 2013, <b>58</b> , 588.          |
| QAZDEA | 2.046 Å | M. Verdenelli, S. Parola, L. G. Hubert-Pfalzgraf and S. Lecocq, <i>Polyhedron</i> 2000, <b>19</b> , 2069-2075.                                                    |
| AFEYAN | 2.046 Å | E. E. Martsinko, I. K. Minacheva, E. A. Chebanenko, I. I. Seifullina, V. S. Sergienko and A. V. Churakov, <i>Russ. J. Inorg. Chem.</i> 2013, <b>58</b> , 515-522. |
| NIRYIX | 2.052 Å | B. F. Abrahams, N. J. FitzGerald and R. Robson, <i>Angew. Chem., Int. Ed.</i> 2007, <b>46</b> , 8640-8643.                                                        |
| KIHCIN | 2.053 Å | T. A. Wark, E. A. Gulliver, M. J. Hampden-Smith and A. L. Rheingold, <i>Inorg. Chem.</i> 1990, <b>29</b> , 4360-4362.                                             |
| QIRPAI | 2.054 Å | X. Sun, D. W. Johnson, D. L. Caulder, K. N. Raymond and E. H. Wong, <i>J. Am. Chem. Soc.</i> 2001, <b>123</b> , 2752-2763.                                        |
| VOHTET | 2.054 Å | G. A. Seisenbaeva, S. D. Topel and V. G. Kessler, <i>Polyhedron</i> 2014, <b>81</b> , 21-26.                                                                      |
| LAGLEN | 2.057 Å | M. B. Diop, L. Diop, L. Plasseraud and T. Maris, <i>Acta Crystallogr., Sect. E</i> 2016, <b>72</b> , 355-357.                                                     |
| QAWMIM | 2.058 Å | P. C. Andrews, P. C. Junk, I. Nuzhnaya and D. T. Thielemann, <i>Inorg. Chem.</i> 2012, <b>51</b> , 751-753.                                                       |
| KOBXEF | 2.059 Å | S.-L. Li, Y.-Q. Lan, J.-F. Ma, J. Yang, M. Zhang and Z.-M. Su <i>Inorg. Chem.</i> 2008, <b>47</b> , 2931-2933.                                                    |
| JIRJEA | 2.059 Å | G. A. Abakumov, V. K. Cherkasov, A. V. Piskunov, A. V. Lado, G. K. Fukin and E. V. Baranov, <i>Dokl. Akad. Nauk SSSR</i> 2006, <b>410</b> , 145-149.              |
| JELMOC | 2.060 Å | M. J. Hampden-Smith, D. E. Smith and E. N. Duesler, <i>Inorg. Chem.</i> 1989, <b>28</b> , 3399-3401.                                                              |
| FESJES | 2.060 Å | X. Sun, D. W. Johnson, D. L. Caulder, R. E. Powers, K. N. Raymond and E. H. Wong, <i>Angew. Chem., Int. Ed.</i> 1999, <b>38</b> , 1303-1307.                      |
| VOLMIS | 2.061 Å | C. Lamberth, J. C. Machell, D. M. P. Mingos and T. L. Stolberg, <i>J. Mater. Chem.</i> 1991, <b>1</b> , 775-780.                                                  |
| KOBXIJ | 2.062 Å | S.-L. Li, Y.-Q. Lan, J.-F. Ma, J. Yang, M. Zhang and Z.-M. Su, <i>Inorg. Chem.</i> 2008, <b>47</b> , 2931-2933.                                                   |
| GANYOJ | 2.062 Å | T. A. Annan, R. K. Chadha, D. G. Tuck and K. D. Watson, <i>Can. J. Chem.</i> 1987, <b>65</b> , 2670-2676.                                                         |
| GAJFUS | 2.063 Å | R. R. Holmes, S. Shafieezad, V. Chandrasekhar, A. C. Sau, J. M. Holmes and R. A. Day, <i>J. Am. Chem. Soc.</i> 1988, <b>110</b> , 1168-1174.                      |
| VERDUS | 2.065 Å | K. Benner, J. Ihringer, P. Klufers and D. Marinov, <i>Angew. Chem., Int. Ed.</i> 2006, <b>45</b> , 5818-5822.                                                     |
| QAWMEI | 2.069 Å | P. C. Andrews, P. C. Junk, I. Nuzhnaya and D. T. Thielemann, <i>Inorg. Chem.</i> 2012, <b>51</b> , 751-753.                                                       |
| NOWWEB | 2.070 Å | P. R. Deacon, M. F. Mahon, K. C. Molloy and P. C. Waterfield, <i>J. Chem. Soc., Dalton Trans.</i> 1997, 3705-3712.                                                |



|        |         |                                                                                                                                                                |
|--------|---------|----------------------------------------------------------------------------------------------------------------------------------------------------------------|
| XECSOJ | 2.072 Å | A. V. Piskunov, A. V. Lado, G. K. Fukin, E. V. Baranov, L. G. Abakumova, V. K. Cherkasov and G. A. Abakumov, <i>Heteroat. Chem.</i> 2006, <b>17</b> , 481-490. |
| XECSID | 2.074 Å | A. V. Piskunov, A. V. Lado, G. K. Fukin, E. V. Baranov, L. G. Abakumova, V. K. Cherkasov and G. A. Abakumov, <i>Heteroat. Chem.</i> 2006, <b>17</b> , 481-490. |

**Mean Sn-O bond distance: 2.054 Å/30 structures**

*Six-coordinate structures (small binuclear, both tin(IV))*

|          |         |                                                                                                                                                                                                   |
|----------|---------|---------------------------------------------------------------------------------------------------------------------------------------------------------------------------------------------------|
| ZEBNEZ   | 2.043 Å | C. D. Chandler, J. Caruso, M. J. Hampden-Smith and A. L. Rheingold, <i>Polyhedron</i> 1995, <b>14</b> , 2491-2497.                                                                                |
| VISKOX   | 2.050 Å | M. J. Hampden-Smith, T. A. Wark, A. L. Rheingold and J. C. Huffman, <i>Can. J. Chem.</i> 1991, <b>69</b> , 121-129.                                                                               |
| VISKOX01 | 2.053 Å | H. Reuter and M. Kremser, <i>Z. Anorg. Allg. Chem.</i> 1991, <b>598</b> , 259-268.                                                                                                                |
| TIRHAF   | 2.056 Å | C. Leonhardt, S. Brumm, A. Seifert, G. Cox, A. Lange, T. Ruffer, D. Schaarschmidt, H. Lang, N. Johrmann, M. Hietschold, F. Simon and M. Mehring, <i>ChemPlusChem</i> 2013, <b>78</b> , 1400-1412. |
| FICDIE   | 2.058 Å | C. D. Chandler, G. D. Fallon, A. J. Koplick and B. O. West, <i>Aust. J. Chem.</i> 1987, <b>40</b> , 1427-1439.                                                                                    |
| TIRGUY   | 2.076 Å | C. Leonhardt, S. Brumm, A. Seifert, G. Cox, A. Lange, T. Ruffer, D. Schaarschmidt, H. Lang, N. Johrmann, M. Hietschold, F. Simon and M. Mehring, <i>ChemPlusChem</i> 2013, <b>78</b> , 1400-1412. |

**Mean Sn-O bond distance: 2.056 Å/6 structures**

*Seven-coordinate structures*

|        |         |                                                                                                                |
|--------|---------|----------------------------------------------------------------------------------------------------------------|
| KSNOXT | 2.115 Å | G. J. Kruger, E. L. J. Breet and R. van Eldik, <i>Inorg. Chim. Acta</i> 1976, <b>19</b> , 151-157.             |
| PACSNA | 2.125 Å | N. W. Alcock and V. L. Tracy, <i>J. Chem. Soc., Dalton Trans.</i> 1976, 2246-2249.                             |
| ROPYEA | 2.140 Å | M. C. Barret, M. F. Mahon, K. C. Molloy and P. Wright, <i>Main Group Met. Chem.</i> 2000, <b>23</b> , 663-672. |
| TRSNOH | 2.121 Å | J. J. Park, D. M. Collins and J. L. Hoard, <i>J. Am. Chem. Soc.</i> 1970, <b>92</b> , 3636-3644.               |
| VEDKAR | 2.135 Å | E. Martinez-Ferrero, K. Boubekeur and F. Ribot, <i>Eur. J. Inorg. Chem.</i> 2006, 802-807. (binuclear)         |

**5 structures – mean Sn-O bond distance: 2.127 Å**

*Eight-coordinate structures*

|        |         |                                                                                                                 |
|--------|---------|-----------------------------------------------------------------------------------------------------------------|
| HOKVIM | 2.164 Å | L. Párkányi, A. Kálmán, A. Deák, M. Venter and I. Haiduc, <i>Inorg. Chem. Commun.</i> 1999, <b>2</b> , 265-268. |
| PUMCAB | 2.169 Å | M. Kira, L. C. Zhang, C. Kabuto and H. Sakurai, <i>Organometallics</i> 1998, <b>17</b> , 887-892.               |

|          |         |                                                                                                                                                                                 |
|----------|---------|---------------------------------------------------------------------------------------------------------------------------------------------------------------------------------|
| MULPUE   | 2.171 Å | L. Abis, D. B. Dell'Amico, F. Calderazzo, R. Caminiti, F. Garbassi, S. Ianelli, G. Pelizzi, P. Robino and A. Tomei, <i>J. Mol. Catal. A:Chem.</i> 1996, <b>108</b> , L113-L117. |
| BAKBEW   | 2.175 Å | B. F. Abrahams, M. J. Grannas, T. A. Hudson, S. A. Hughes, N. H. Pranoto and R. Robson, <i>Dalton Trans.</i> 2011, <b>40</b> , 12242-12247.                                     |
| BAKBIA   | 2.175 Å | B. F. Abrahams, M. J. Grannas, T. A. Hudson, S. A. Hughes, N. H. Pranoto and R. Robson, <i>Dalton Trans.</i> 2011, <b>40</b> , 12242-12247.                                     |
| HENJAO   | 2.177 Å | G. J.-P. Deblonde, T. D. Lohrey, D. D. An and R. J. Abergel, <i>New J. Chem.</i> 2018, <b>42</b> , 7649-7658.                                                                   |
| BAKBOG   | 2.178 Å | B. F. Abrahams, M. J. Grannas, T. A. Hudson, S. A. Hughes, N. H. Pranoto and R. Robson, <i>Dalton Trans.</i> 2011, <b>40</b> , 12242-12247.                                     |
| UGOZUL   | 2.181 Å | G. A. Horley, M. F. Mahon, K. C. Molloy, P. W. Haycock and C. P. Myers, <i>Inorg. Chem.</i> 2002, <b>41</b> , 5052-5058.                                                        |
| XIVBIP   | 2.184 Å | N. Gueye, L. Diop and H. Stoeckli-Evans, <i>Acta Crystallogr., Sect. E</i> 2014, <b>70</b> , m49-m50.                                                                           |
| ACETSN01 | 2.218 Å | N. W. Alcock and V. L. Tracy, <i>Acta Crystallogr., Sect. B</i> 1979, <b>35</b> , 80-83.                                                                                        |

**9 structures – mean Sn-O bond distance: 2.175 Å**

*Nine-coordinate structures*

None reported

**Mean Sn-O bond distances (±s)**

*All four-coordinate tin(IV) complexes: 1.955(4) Å /6 structures*

*All five-coordinate tin(IV) complexes: 2.011 Å /1 structure*

*All six-coordinate tin(IV) complexes (and oxides): 2.053(13) Å /114 structures*

*All seven-coordinate tin(IV) complexes: 2.127(10) Å /5 structures*

*All eight-coordinate tin(IV) complexes: 2.175(6) Å /9 structures*

**Table S2.** Summary of mean bond distances in six-coordinate tin(IV) compounds with S-donors. The given refcode refers to the respective structure's CSD entry, ref. 3. Mean bond distances are listed for all Sn-S bonds, but also shown separated into bonding type (Sn-S<sub>μ2</sub>/Sn-S<sub>κ</sub>).

*Six-coordinate structures (small binuclear, both tin(IV))*

|                                                                             |                           |                                                                                                                                                                                                   |
|-----------------------------------------------------------------------------|---------------------------|---------------------------------------------------------------------------------------------------------------------------------------------------------------------------------------------------|
|                                                                             | 2.534 Å (2.463 Å/2.571 Å) | H. Reuter and M. Kremser, <i>Z. Anorg. Allg. Chem.</i> 1991, <b>598</b> , 259-268.                                                                                                                |
| NOPTET                                                                      | 2.536 Å (2.469 Å/2.569 Å) | C. Leonhardt, S. Brumm, A. Seifert, G. Cox, A. Lange, T. Ruffer, D. Schaarschmidt, H. Lang, N. Joermann, M. Hietschold, F. Simon and M. Mehring, <i>ChemPlusChem</i> 2013, <b>78</b> , 1400-1412. |
| KEFBUS                                                                      | 2.537 Å (2.448 Å/2.582 Å) | M. J. Hampden-Smith, T. A. Wark, A. L. Rheingold and J. C. Huffman, <i>Can. J. Chem.</i> 1991, <b>69</b> , 121-129.                                                                               |
| YONXUW                                                                      | 2.539 Å (2.448 Å/2.585 Å) | C. D. Chandler, G. D. Fallon, A. J. Koplick and B. O. West, <i>Aust. J. Chem.</i> 1987, <b>40</b> , 1427-1439.                                                                                    |
| FADYOZ                                                                      | 2.542 Å (2.450 Å/2.588 Å) | C. D. Chandler, J. Caruso, M. J. Hampden-Smith and A. L. Rheingold, <i>Polyhedron</i> 1995, <b>14</b> , 2491-2497.                                                                                |
| <b>5 structures – mean Sn-S bond distance: 2.538(3) Å (2.456 Å/2.579 Å)</b> |                           |                                                                                                                                                                                                   |

**Table S3a.** The .cif file for **1**, [Sn(OS(CH<sub>3</sub>)<sub>2</sub>)<sub>5</sub>CH<sub>3</sub>](ClO<sub>4</sub>)<sub>3</sub>. *Note:* The hkl part of the .cif file has been deleted from this table due to its length. It can be obtained for free upon request at the Cambridge Crystallographic Data Centre (CCDC) at <<https://www.ccdc.cam.ac.uk/structures/>>.

```
data_sn4dms0_0m
_publ_requested_journal      'Dalton Trans.'
_publ_contact_author_name    'Daniel Lundberg'
_publ_contact_author_address
;Department of Molecular Sciences
Swedish University of Agricultural Sciences
P.O. Box 7015
SE-750 07 Uppsala
SWEDEN
;
_publ_contact_author_email    daniel.lundberg@slu.se
_publ_contact_author_phone    +46-18-671549
loop_
_publ_author_name
_publ_author_address
'Lundberg, Daniel'
;Department of Molecular Sciences
Swedish University of Agricultural Sciences
P.O. Box 7015
SE-750 07 Uppsala
SWEDEN
;
'Persson, Ingmar'
;Department of Molecular Sciences
Swedish University of Agricultural Sciences
P.O. Box 7015
SE-750 07 Uppsala
SWEDEN
;
_publ_section_title
;\ 'On solvated tin(IV) ions and the coordination\
chemistry of high-valent d10 metal ions'
;
_publ_section_abstract
;\ 'A very slow oxidation of the dimethylsulfoxide (dms0)\
solvated tin(II) ions in solution results in the formation\
of a crystalline, structurally determined compound\
[Sn(OS(CH3)2)5CH3](ClO4)3 whereas a similar reaction in\
N,N-dimethylthioformamide (dmtf) forms a crystalline solid\
with a binuclear [Sn2(SH)2(SCHN(CH3)2)8]6+ entity whose exact\
formula remains undetermined. Both solids precipitate with\
time in their respective mother liquids and constitute the\
first two tin(IV) and even tetravalent d10 metal ion solvate\
complexes reported. An EXAFS study showed that the structure\
of the [Sn(OS(CH3)2)5CH3]3+ complex is identical in solid\
state and dimethylsulfoxide solution. While the exact\
chemical reactions are unknown, the formation of these\
complexes are shown to be possible from an electrochemical\
point-of-view.
;
_audit_creation_method        SHELXL-2016/6
```

```

_chemical_name_systematic
'pentakis(dimethylsulfoxide)methyltin(II) perchlorate'
_chemical_name_common      'pentakis(dmsO)methyltin(II) perchlorate'
_chemical_formula_moiety   'C11 H33 O5 S5 Sn, 3(Cl O4)'
_chemical_formula_sum      'C11 H33 Cl3 O17 S5 Sn'
_chemical_compound_source  'synthesized from dmsO solution'
_chemical_properties_physical moisture-sensitive
_exptl_crystal_recrystallization_method dmsO
_chemical_melting_point    ?

```

```

_exptl_crystal_description  block
_exptl_crystal_colour       colourless
_diffn_ambient_temperature  296(2)
_chemical_formula_weight    822.73

```

```

loop_
_atom_type_symbol
_atom_type_description
_atom_type_scatter_dispersion_real
_atom_type_scatter_dispersion_imag
_atom_type_scatter_source
C C 0.0033 0.0016 'International Tables Vol C Tables 4.2.6.8 and 6.1.1.4'
H H 0.0000 0.0000 'International Tables Vol C Tables 4.2.6.8 and 6.1.1.4'
O O 0.0106 0.0060 'International Tables Vol C Tables 4.2.6.8 and 6.1.1.4'
S S 0.1246 0.1234 'International Tables Vol C Tables 4.2.6.8 and 6.1.1.4'
Cl Cl 0.1484 0.1585 'International Tables Vol C Tables 4.2.6.8 and 6.1.1.4'
Sn Sn -0.6537 1.4246 'International Tables Vol C Tables 4.2.6.8 and 6.1.1.4'

```

```

_space_group_crystal_system monoclinic
_space_group_IT_number      14
_space_group_name_H-M_alt   'P 21/c'
_space_group_name_Hall      '-P 2ybc'
_chemical_absolute_configuration ?

```

```

loop_
_space_group_symop_operation_xyz
'x, y, z'
'-x, y+1/2, -z+1/2'
'-x, -y, -z'
'x, -y-1/2, z-1/2'

```

```

_shelx_space_group_comment

```

```

;
The symmetry employed for this shelx refinement is uniquely defined
by the following loop, which should always be used as a source of
symmetry information in preference to the above space-group names.
They are only intended as comments.
;

```

```

_cell_length_a      11.530(6)
_cell_length_b      15.232(8)
_cell_length_c      18.522(10)
_cell_angle_alpha   90
_cell_angle_beta    100.511(6)
_cell_angle_gamma   90

```

```

_cell_volume          3198(3)
_cell_formula_units_Z      4
_cell_measurement_temperature  296(2)
_cell_measurement_reflns_used  912
_cell_measurement_theta_min   3.3210
_cell_measurement_theta_max   32.2165
_exptl_crystal_density_meas   ?
_exptl_crystal_density_method ?
_exptl_crystal_density_diffn  1.704
_exptl_crystal_F_000         1664
_exptl_transmission_factor_min ?
_exptl_transmission_factor_max ?
_exptl_crystal_size_max       0.4
_exptl_crystal_size_mid       0.3
_exptl_crystal_size_min       0.2
_exptl_absorpt_coefficient_mu  1.439
_shelx_estimated_absorpt_T_min 0.649
_shelx_estimated_absorpt_T_max 0.656
_exptl_absorpt_correction_type multi-scan
_exptl_absorpt_correction_T_min 0.658
_exptl_absorpt_correction_T_max 0.673
_exptl_absorpt_process_details 'SADABS (Bruker, 2003)'
_diffn_radiation_probe        X-ray
_diffn_radiation_type          MoK\alpha
_diffn_radiation_wavelength    0.71073
_diffn_source                   'sealed X-ray tube'
_diffn_source_type              'Bruker APEX-II'
_diffn_measurement_device_type  'Bruker APEX-II'
_diffn_measurement_method       '\q and \w scans'
_diffn_detector_area_resol_mean .
_diffn_standards_number         0
_diffn_standards_interval_count 0
_diffn_standards_interval_time  0
_diffn_standards_decay_percent .
_diffn_reflns_number            25161
_diffn_reflns_av_unetI/netI     0.0186
_diffn_reflns_av_R_equivalents  0.0224
_diffn_reflns_limit_h_min       -13
_diffn_reflns_limit_h_max        14
_diffn_reflns_limit_k_min       -18
_diffn_reflns_limit_k_max        18
_diffn_reflns_limit_l_min       -22
_diffn_reflns_limit_l_max        22
_diffn_reflns_theta_min         2.601
_diffn_reflns_theta_max         25.681
_diffn_reflns_theta_full        25.242
_diffn_measured_fraction_theta_max 0.998
_diffn_measured_fraction_theta_full 0.998
_diffn_reflns_Laue_measured_fraction_max 0.998
_diffn_reflns_Laue_measured_fraction_full 0.998
_diffn_reflns_point_group_measured_fraction_max 0.998
_diffn_reflns_point_group_measured_fraction_full 0.998
_reflns_number_total            6063
_reflns_number_gt                5183
_reflns_threshold_expression     'I > 2\sigma(I)'

```

\_reflns\_Friedel\_coverage 0.000  
\_reflns\_Friedel\_fraction\_max .  
\_reflns\_Friedel\_fraction\_full .

\_reflns\_special\_details

;

Reflections were merged by SHELXL according to the crystal class for the calculation of statistics and refinement.

\_reflns\_Friedel\_fraction is defined as the number of unique Friedel pairs measured divided by the number that would be possible theoretically, ignoring centric projections and systematic absences.

;

\_computing\_data\_collection 'SAINT (Bruker, 2012)'  
\_computing\_cell\_refinement 'SAINT (Bruker, 2012)'  
\_computing\_data\_reduction 'SAINT (Bruker, 2012)'  
\_computing\_structure\_solution 'SHELXS-2016/6 (Sheldrick, 2016)'  
\_computing\_structure\_refinement 'SHELXL-2016/6 (Sheldrick, 2016)'  
\_computing\_molecular\_graphics 'Diamond 2.1e (Crystal Impact GbR, 2001)'  
\_computing\_publication\_material ?  
\_refine\_special\_details ?  
\_refine\_ls\_structure\_factor\_coef Fsqd  
\_refine\_ls\_matrix\_type full  
\_refine\_ls\_weighting\_scheme calc  
\_refine\_ls\_weighting\_details  
'w=1/[s^2+(Fo^2)+(0.0361P)^2+1.3277P] where P=(Fo^2+2Fc^2)/3'  
\_atom\_sites\_solution\_primary ?  
\_atom\_sites\_solution\_secondary ?  
\_atom\_sites\_solution\_hydrogens geom  
\_refine\_ls\_hydrogen\_treatment constr  
\_refine\_ls\_extinction\_method none  
\_refine\_ls\_extinction\_coef .  
\_refine\_ls\_number\_reflns 6063  
\_refine\_ls\_number\_parameters 420  
\_refine\_ls\_number\_restraints 80  
\_refine\_ls\_R\_factor\_all 0.0332  
\_refine\_ls\_R\_factor\_gt 0.0262  
\_refine\_ls\_wR\_factor\_ref 0.0692  
\_refine\_ls\_wR\_factor\_gt 0.0648  
\_refine\_ls\_goodness\_of\_fit\_ref 1.022  
\_refine\_ls\_restrained\_S\_all 1.028  
\_refine\_ls\_shift/su\_max 0.002  
\_refine\_ls\_shift/su\_mean 0.000

loop\_

\_atom\_site\_label  
\_atom\_site\_type\_symbol  
\_atom\_site\_fract\_x  
\_atom\_site\_fract\_y  
\_atom\_site\_fract\_z  
\_atom\_site\_U\_iso\_or\_equiv  
\_atom\_site\_adp\_type  
\_atom\_site\_occupancy

\_atom\_site\_site\_symmetry\_order  
 \_atom\_site\_calc\_flag  
 \_atom\_site\_refinement\_flags\_posn  
 \_atom\_site\_refinement\_flags\_adp  
 \_atom\_site\_refinement\_flags\_occupancy  
 \_atom\_site\_disorder\_assembly  
 \_atom\_site\_disorder\_group  
 Sn1 Sn 0.67945(2) 0.27298(2) 0.81575(2) 0.04122(7) Uani 1 1 d . . . . .  
 O1 O 0.85095(15) 0.31489(13) 0.80681(9) 0.0521(4) Uani 1 1 d . . . . .  
 S1 S 0.91981(6) 0.29002(5) 0.74551(4) 0.05651(18) Uani 1 1 d . . . . .  
 C11 C 1.0167(4) 0.3795(3) 0.7488(3) 0.0992(13) Uani 1 1 d . . . . .  
 H11A H 0.972173 0.432179 0.735536 0.149 Uiso 1 1 calc R U . . .  
 H11B H 1.069380 0.369857 0.714996 0.149 Uiso 1 1 calc R U . . .  
 H11C H 1.061365 0.385329 0.797619 0.149 Uiso 1 1 calc R U . . .  
 C12 C 1.0177(3) 0.2075(3) 0.7848(2) 0.0881(11) Uani 1 1 d . . . . .  
 H12A H 1.059605 0.226965 0.831630 0.132 Uiso 1 1 calc R U . . .  
 H12B H 1.072839 0.195255 0.753020 0.132 Uiso 1 1 calc R U . . .  
 H12C H 0.974127 0.155254 0.791119 0.132 Uiso 1 1 calc R U . . .  
 O2 O 0.74789(19) 0.14571(12) 0.83525(10) 0.0615(5) Uani 1 1 d . . . . .  
 S2 S 0.75042(7) 0.08737(5) 0.90312(4) 0.05816(18) Uani 1 1 d . . . . .  
 C21 C 0.8823(3) 0.0283(3) 0.9057(2) 0.1010(13) Uani 1 1 d . . . . .  
 H21A H 0.884059 0.004271 0.857972 0.152 Uiso 1 1 calc R U . . .  
 H21B H 0.886373 -0.018519 0.940760 0.152 Uiso 1 1 calc R U . . .  
 H21C H 0.948381 0.066892 0.919699 0.152 Uiso 1 1 calc R U . . .  
 C22 C 0.6479(4) 0.0040(3) 0.8739(2) 0.0950(12) Uani 1 1 d . . . . .  
 H22A H 0.569493 0.027548 0.867620 0.143 Uiso 1 1 calc R U . . .  
 H22B H 0.656649 -0.041933 0.909972 0.143 Uiso 1 1 calc R U . . .  
 H22C H 0.661411 -0.019401 0.827979 0.143 Uiso 1 1 calc R U . . .  
 O3 O 0.61124(16) 0.39991(12) 0.81777(11) 0.0567(5) Uani 1 1 d . . . . .  
 S3 S 0.67500(6) 0.48511(5) 0.84759(4) 0.05804(18) Uani 1 1 d . . . . .  
 C31 C 0.6034(4) 0.5637(2) 0.7853(2) 0.0861(11) Uani 1 1 d . . . . .  
 H31A H 0.626257 0.555666 0.738435 0.129 Uiso 1 1 calc R U . . .  
 H31B H 0.625399 0.621521 0.803380 0.129 Uiso 1 1 calc R U . . .  
 H31C H 0.519565 0.556692 0.780159 0.129 Uiso 1 1 calc R U . . .  
 C32 C 0.6137(4) 0.5108(2) 0.92486(19) 0.0840(10) Uani 1 1 d . . . . .  
 H32A H 0.529258 0.512062 0.911400 0.126 Uiso 1 1 calc R U . . .  
 H32B H 0.641613 0.567321 0.943387 0.126 Uiso 1 1 calc R U . . .  
 H32C H 0.636603 0.467182 0.962125 0.126 Uiso 1 1 calc R U . . .  
 O4 O 0.53749(17) 0.22795(12) 0.86211(11) 0.0583(5) Uani 1 1 d . . . . .  
 S4 S 0.48226(8) 0.27476(6) 0.92141(5) 0.0712(2) Uani 1 1 d . . . . .  
 C41 C 0.5019(4) 0.1978(4) 0.9941(2) 0.1115(15) Uani 1 1 d . . . . .  
 H41A H 0.470508 0.141978 0.975982 0.167 Uiso 1 1 calc R U . . .  
 H41B H 0.461330 0.217786 1.031911 0.167 Uiso 1 1 calc R U . . .  
 H41C H 0.584460 0.191797 1.013840 0.167 Uiso 1 1 calc R U . . .  
 C42 C 0.3302(3) 0.2630(3) 0.8878(3) 0.0947(13) Uani 1 1 d . . . . .  
 H42A H 0.309119 0.295465 0.842873 0.142 Uiso 1 1 calc R U . . .  
 H42B H 0.286675 0.285015 0.923397 0.142 Uiso 1 1 calc R U . . .  
 H42C H 0.311981 0.202035 0.878656 0.142 Uiso 1 1 calc R U . . .  
 O5 O 0.74955(15) 0.30365(12) 0.92512(9) 0.0503(4) Uani 1 1 d . . . . .  
 S5 S 0.87920(6) 0.28663(5) 0.96342(4) 0.05144(17) Uani 1 1 d . . . . .  
 C51 C 0.8616(3) 0.2635(2) 1.05441(16) 0.0704(9) Uani 1 1 d . . . . .  
 H51A H 0.810018 0.306284 1.069843 0.106 Uiso 1 1 calc R U . . .  
 H51B H 0.937018 0.265647 1.086450 0.106 Uiso 1 1 calc R U . . .  
 H51C H 0.828104 0.206021 1.056317 0.106 Uiso 1 1 calc R U . . .  
 C52 C 0.9402(3) 0.3932(2) 0.97516(18) 0.0741(9) Uani 1 1 d . . . . .



H52A H 0.943112 0.418315 0.927987 0.111 Uiso 1 1 calc R U . . .  
 H52B H 1.018518 0.389943 1.003553 0.111 Uiso 1 1 calc R U . . .  
 H52C H 0.892035 0.429285 1.000322 0.111 Uiso 1 1 calc R U . . .  
 C6 C 0.6069(3) 0.2536(2) 0.70451(16) 0.0643(8) Uani 1 1 d . . . . .  
 H6A H 0.522339 0.254548 0.698102 0.096 Uiso 1 1 calc R U . . .  
 H6B H 0.632131 0.197850 0.688796 0.096 Uiso 1 1 calc R U . . .  
 H6C H 0.632872 0.299523 0.675741 0.096 Uiso 1 1 calc R U . . .  
 Cl1 Cl 0.24363(8) 0.51909(5) 0.85942(4) 0.0703(2) Uani 1 1 d D . . . . .  
 O11 O 0.3005(3) 0.4704(2) 0.81195(19) 0.1335(12) Uani 1 1 d D . . . . .  
 O12 O 0.1533(3) 0.5683(2) 0.81741(18) 0.1347(13) Uani 1 1 d D . . . . .  
 O13 O 0.1971(3) 0.4620(2) 0.90588(15) 0.1139(10) Uani 1 1 d D . . . . .  
 O14 O 0.3229(3) 0.5782(2) 0.90249(17) 0.1089(9) Uani 1 1 d D . . . . .  
 Cl2 Cl 0.24543(9) -0.00531(5) 0.89096(5) 0.0739(2) Uani 1 1 d D U . . . . .  
 O21 O 0.2019(13) 0.0629(5) 0.8521(7) 0.190(6) Uani 0.627(13) 1 d D . P A 1  
 O22 O 0.1560(7) -0.0363(7) 0.9269(5) 0.157(4) Uani 0.627(13) 1 d D . P A 1  
 O23 O 0.2682(9) -0.0734(6) 0.8484(7) 0.191(6) Uani 0.627(13) 1 d D . P A 1  
 O24 O 0.3426(10) 0.0173(8) 0.9414(7) 0.208(6) Uani 0.627(13) 1 d D . P A 1  
 O21B O 0.213(2) 0.0459(13) 0.9428(10) 0.224(10) Uani 0.373(13) 1 d D U P A 2  
 O22B O 0.1993(16) 0.0258(17) 0.8236(9) 0.205(12) Uani 0.373(13) 1 d D U P A 2  
 O23B O 0.3600(10) 0.0061(18) 0.8941(9) 0.212(10) Uani 0.373(13) 1 d D U P A 2  
 O24B O 0.226(2) -0.0861(8) 0.9001(12) 0.236(12) Uani 0.373(13) 1 d D U P A 2  
 Cl3 Cl 0.20400(8) 0.24935(6) 0.59644(7) 0.0830(3) Uani 1 1 d D U . . . . .  
 O31 O 0.1506(15) 0.2010(14) 0.6410(10) 0.190(9) Uani 0.433(12) 1 d D U P B 1  
 O32 O 0.2291(18) 0.1924(8) 0.5473(9) 0.211(9) Uani 0.433(12) 1 d D U P B 1  
 O33 O 0.1266(12) 0.3133(8) 0.5726(14) 0.185(9) Uani 0.433(12) 1 d D U P B 1  
 O34 O 0.3017(12) 0.2895(9) 0.6309(12) 0.220(9) Uani 0.433(12) 1 d D U P B 1  
 O31B O 0.1612(8) 0.1676(5) 0.6138(6) 0.123(4) Uani 0.567(12) 1 d D U P B 2  
 O32B O 0.191(2) 0.3028(9) 0.6504(10) 0.280(10) Uani 0.567(12) 1 d D U P B 2  
 O33B O 0.1447(10) 0.2756(10) 0.5280(6) 0.184(7) Uani 0.567(12) 1 d D U P B 2  
 O34B O 0.3209(5) 0.2410(7) 0.5937(5) 0.126(4) Uani 0.567(12) 1 d D U P B 2

loop\_

\_atom\_site\_aniso\_label  
 \_atom\_site\_aniso\_U\_11  
 \_atom\_site\_aniso\_U\_22  
 \_atom\_site\_aniso\_U\_33  
 \_atom\_site\_aniso\_U\_23  
 \_atom\_site\_aniso\_U\_13  
 \_atom\_site\_aniso\_U\_12  
 Sn1 0.04208(10) 0.04120(11) 0.04101(10) -0.00053(7) 0.00925(7) -0.00118(7)  
 O1 0.0458(10) 0.0676(12) 0.0450(9) -0.0039(9) 0.0139(8) -0.0098(9)  
 S1 0.0526(4) 0.0749(5) 0.0450(4) -0.0013(3) 0.0167(3) -0.0060(3)  
 C11 0.090(3) 0.099(3) 0.121(3) 0.004(3) 0.052(2) -0.033(2)  
 C12 0.067(2) 0.097(3) 0.104(3) 0.009(2) 0.027(2) 0.016(2)  
 O2 0.0846(14) 0.0479(10) 0.0581(11) 0.0070(9) 0.0293(10) 0.0162(10)  
 S2 0.0725(5) 0.0506(4) 0.0535(4) 0.0057(3) 0.0171(3) 0.0114(3)  
 C21 0.091(3) 0.088(3) 0.128(3) 0.032(2) 0.031(2) 0.039(2)  
 C22 0.105(3) 0.075(2) 0.102(3) 0.012(2) 0.011(2) -0.016(2)  
 O3 0.0536(11) 0.0454(10) 0.0683(12) -0.0022(9) 0.0035(9) 0.0065(8)  
 S3 0.0575(4) 0.0456(4) 0.0691(4) -0.0028(3) 0.0067(3) 0.0047(3)  
 C31 0.118(3) 0.0562(19) 0.080(2) 0.0082(17) 0.008(2) 0.013(2)  
 C32 0.107(3) 0.077(2) 0.069(2) -0.0171(18) 0.0191(19) 0.004(2)  
 O4 0.0542(11) 0.0589(12) 0.0670(12) -0.0086(9) 0.0250(9) -0.0112(9)  
 S4 0.0607(5) 0.0731(5) 0.0882(6) -0.0187(4) 0.0362(4) -0.0136(4)  
 C41 0.099(3) 0.172(5) 0.072(2) 0.017(3) 0.037(2) 0.010(3)

C42 0.058(2) 0.088(3) 0.143(4) 0.009(2) 0.033(2) 0.0087(19)  
 O5 0.0479(10) 0.0625(11) 0.0405(9) -0.0051(8) 0.0083(8) 0.0017(8)  
 S5 0.0497(4) 0.0616(4) 0.0422(3) -0.0019(3) 0.0064(3) 0.0025(3)  
 C51 0.080(2) 0.089(2) 0.0413(15) 0.0072(15) 0.0080(15) -0.0035(18)  
 C52 0.071(2) 0.077(2) 0.071(2) -0.0025(17) 0.0037(16) -0.0183(17)  
 C6 0.071(2) 0.0672(18) 0.0500(16) -0.0048(14) -0.0005(14) -0.0120(15)  
 C11 0.0799(5) 0.0664(5) 0.0674(5) 0.0034(4) 0.0204(4) 0.0037(4)  
 O11 0.172(3) 0.120(3) 0.132(3) -0.016(2) 0.090(2) 0.009(2)  
 O12 0.127(3) 0.120(3) 0.139(3) 0.021(2) -0.025(2) 0.027(2)  
 O13 0.146(3) 0.113(2) 0.0918(19) 0.0105(17) 0.0453(18) -0.029(2)  
 O14 0.105(2) 0.097(2) 0.119(2) -0.0057(17) 0.0062(17) -0.0146(17)  
 C12 0.0887(6) 0.0592(5) 0.0755(5) 0.0050(4) 0.0195(5) -0.0030(4)  
 O21 0.271(13) 0.082(5) 0.205(12) 0.066(6) 0.011(9) 0.032(5)  
 O22 0.143(6) 0.162(9) 0.189(7) 0.068(7) 0.093(5) 0.030(5)  
 O23 0.205(9) 0.114(7) 0.277(14) -0.094(8) 0.111(9) -0.001(6)  
 O24 0.159(9) 0.233(10) 0.200(11) -0.038(10) -0.047(8) -0.031(8)  
 O21B 0.30(2) 0.206(17) 0.218(16) -0.070(13) 0.179(16) 0.000(16)  
 O22B 0.150(12) 0.34(3) 0.113(9) 0.126(14) -0.010(8) -0.067(16)  
 O23B 0.077(6) 0.40(3) 0.155(13) -0.067(16) 0.018(7) -0.032(10)  
 O24B 0.38(3) 0.068(7) 0.27(2) 0.067(10) 0.07(2) -0.023(12)  
 C13 0.0692(5) 0.0711(5) 0.1183(8) 0.0024(5) 0.0424(5) 0.0008(4)  
 O31 0.143(10) 0.30(2) 0.146(11) 0.089(13) 0.079(9) -0.031(13)  
 O32 0.30(2) 0.144(10) 0.224(15) -0.083(10) 0.151(15) -0.008(11)  
 O33 0.121(8) 0.091(7) 0.35(3) 0.049(12) 0.060(14) 0.041(6)  
 O34 0.115(10) 0.165(12) 0.36(3) -0.073(13) -0.020(11) -0.043(8)  
 O31B 0.090(5) 0.092(4) 0.171(9) 0.045(5) -0.021(5) -0.030(3)  
 O32B 0.42(3) 0.183(11) 0.304(15) -0.122(12) 0.256(18) -0.041(14)  
 O33B 0.126(7) 0.244(17) 0.174(9) 0.132(10) 0.010(6) 0.005(8)  
 O34B 0.063(3) 0.171(9) 0.156(7) 0.051(6) 0.050(4) -0.001(4)

\_geom\_special\_details

;

All esds (except the esd in the dihedral angle between two l.s. planes)  
 are estimated using the full covariance matrix. The cell esds are taken  
 into account individually in the estimation of esds in distances, angles  
 and torsion angles; correlations between esds in cell parameters are only  
 used when they are defined by crystal symmetry. An approximate (isotropic)  
 treatment of cell esds is used for estimating esds involving l.s. planes.

;

loop\_

\_geom\_bond\_atom\_site\_label\_1

\_geom\_bond\_atom\_site\_label\_2

\_geom\_bond\_distance

\_geom\_bond\_site\_symmetry\_2

\_geom\_bond\_publ\_flag

Sn1 O3 2.090(2) . ?

Sn1 O5 2.0925(19) . ?

Sn1 O4 2.098(2) . ?

Sn1 C6 2.098(3) . ?

Sn1 O2 2.099(2) . ?

Sn1 O1 2.113(2) . ?

O1 S1 1.5464(19) . ?

S1 C12 1.755(4) . ?

S1 C11 1.756(4) . ?

C11 H11A 0.9600 . ?  
C11 H11B 0.9600 . ?  
C11 H11C 0.9600 . ?  
C12 H12A 0.9600 . ?  
C12 H12B 0.9600 . ?  
C12 H12C 0.9600 . ?  
O2 S2 1.535(2) . ?  
S2 C22 1.752(4) . ?  
S2 C21 1.760(4) . ?  
C21 H21A 0.9600 . ?  
C21 H21B 0.9600 . ?  
C21 H21C 0.9600 . ?  
C22 H22A 0.9600 . ?  
C22 H22B 0.9600 . ?  
C22 H22C 0.9600 . ?  
O3 S3 1.543(2) . ?  
S3 C32 1.752(3) . ?  
S3 C31 1.760(3) . ?  
C31 H31A 0.9600 . ?  
C31 H31B 0.9600 . ?  
C31 H31C 0.9600 . ?  
C32 H32A 0.9600 . ?  
C32 H32B 0.9600 . ?  
C32 H32C 0.9600 . ?  
O4 S4 1.541(2) . ?  
S4 C42 1.759(4) . ?  
S4 C41 1.768(4) . ?  
C41 H41A 0.9600 . ?  
C41 H41B 0.9600 . ?  
C41 H41C 0.9600 . ?  
C42 H42A 0.9600 . ?  
C42 H42B 0.9600 . ?  
C42 H42C 0.9600 . ?  
O5 S5 1.555(2) . ?  
S5 C52 1.767(3) . ?  
S5 C51 1.769(3) . ?  
C51 H51A 0.9600 . ?  
C51 H51B 0.9600 . ?  
C51 H51C 0.9600 . ?  
C52 H52A 0.9600 . ?  
C52 H52B 0.9600 . ?  
C52 H52C 0.9600 . ?  
C6 H6A 0.9600 . ?  
C6 H6B 0.9600 . ?  
C6 H6C 0.9600 . ?  
Cl1 O13 1.397(3) . ?  
Cl1 O12 1.399(3) . ?  
Cl1 O11 1.402(3) . ?  
Cl1 O14 1.420(3) . ?  
Cl2 O24B 1.268(10) . ?  
Cl2 O21 1.311(7) . ?  
Cl2 O23B 1.324(12) . ?  
Cl2 O21B 1.344(10) . ?  
Cl2 O22B 1.351(12) . ?  
Cl2 O23 1.357(6) . ?

C12 O24 1.366(8) . ?  
C12 O22 1.407(6) . ?  
C13 O32B 1.319(8) . ?  
C13 O32 1.327(8) . ?  
C13 O34 1.337(10) . ?  
C13 O31 1.337(11) . ?  
C13 O33 1.340(10) . ?  
C13 O34B 1.364(6) . ?  
C13 O33B 1.385(8) . ?  
C13 O31B 1.398(7) . ?

loop\_

\_geom\_angle\_atom\_site\_label\_1  
\_geom\_angle\_atom\_site\_label\_2  
\_geom\_angle\_atom\_site\_label\_3  
\_geom\_angle  
\_geom\_angle\_site\_symmetry\_1  
\_geom\_angle\_site\_symmetry\_3  
\_geom\_angle\_publ\_flag  
O3 Sn1 O5 81.74(7) . . ?  
O3 Sn1 O4 88.33(8) . . ?  
O5 Sn1 O4 82.48(8) . . ?  
O3 Sn1 C6 93.66(11) . . ?  
O5 Sn1 C6 175.17(10) . . ?  
O4 Sn1 C6 98.90(11) . . ?  
O3 Sn1 O2 169.09(7) . . ?  
O5 Sn1 O2 88.44(8) . . ?  
O4 Sn1 O2 85.67(8) . . ?  
C6 Sn1 O2 96.27(11) . . ?  
O3 Sn1 O1 94.74(8) . . ?  
O5 Sn1 O1 78.85(7) . . ?  
O4 Sn1 O1 160.42(8) . . ?  
C6 Sn1 O1 100.19(11) . . ?  
O2 Sn1 O1 87.98(8) . . ?  
S1 O1 Sn1 126.63(11) . . ?  
O1 S1 C12 104.39(16) . . ?  
O1 S1 C11 101.13(16) . . ?  
C12 S1 C11 100.6(2) . . ?  
S1 C11 H11A 109.5 . . ?  
S1 C11 H11B 109.5 . . ?  
H11A C11 H11B 109.5 . . ?  
S1 C11 H11C 109.5 . . ?  
H11A C11 H11C 109.5 . . ?  
H11B C11 H11C 109.5 . . ?  
S1 C12 H12A 109.5 . . ?  
S1 C12 H12B 109.5 . . ?  
H12A C12 H12B 109.5 . . ?  
S1 C12 H12C 109.5 . . ?  
H12A C12 H12C 109.5 . . ?  
H12B C12 H12C 109.5 . . ?  
S2 O2 Sn1 128.74(11) . . ?  
O2 S2 C22 104.80(16) . . ?  
O2 S2 C21 101.85(16) . . ?  
C22 S2 C21 99.7(2) . . ?  
S2 C21 H21A 109.5 . . ?

S2 C21 H21B 109.5 .. ?  
H21A C21 H21B 109.5 .. ?  
S2 C21 H21C 109.5 .. ?  
H21A C21 H21C 109.5 .. ?  
H21B C21 H21C 109.5 .. ?  
S2 C22 H22A 109.5 .. ?  
S2 C22 H22B 109.5 .. ?  
H22A C22 H22B 109.5 .. ?  
S2 C22 H22C 109.5 .. ?  
H22A C22 H22C 109.5 .. ?  
H22B C22 H22C 109.5 .. ?  
S3 O3 Sn1 128.91(11) .. ?  
O3 S3 C32 104.09(15) .. ?  
O3 S3 C31 101.62(15) .. ?  
C32 S3 C31 99.94(19) .. ?  
S3 C31 H31A 109.5 .. ?  
S3 C31 H31B 109.5 .. ?  
H31A C31 H31B 109.5 .. ?  
S3 C31 H31C 109.5 .. ?  
H31A C31 H31C 109.5 .. ?  
H31B C31 H31C 109.5 .. ?  
S3 C32 H32A 109.5 .. ?  
S3 C32 H32B 109.5 .. ?  
H32A C32 H32B 109.5 .. ?  
S3 C32 H32C 109.5 .. ?  
H32A C32 H32C 109.5 .. ?  
H32B C32 H32C 109.5 .. ?  
S4 O4 Sn1 126.53(11) .. ?  
O4 S4 C42 102.41(18) .. ?  
O4 S4 C41 102.93(18) .. ?  
C42 S4 C41 100.5(2) .. ?  
S4 C41 H41A 109.5 .. ?  
S4 C41 H41B 109.5 .. ?  
H41A C41 H41B 109.5 .. ?  
S4 C41 H41C 109.5 .. ?  
H41A C41 H41C 109.5 .. ?  
H41B C41 H41C 109.5 .. ?  
S4 C42 H42A 109.5 .. ?  
S4 C42 H42B 109.5 .. ?  
H42A C42 H42B 109.5 .. ?  
S4 C42 H42C 109.5 .. ?  
H42A C42 H42C 109.5 .. ?  
H42B C42 H42C 109.5 .. ?  
S5 O5 Sn1 125.02(10) .. ?  
O5 S5 C52 103.34(14) .. ?  
O5 S5 C51 101.52(14) .. ?  
C52 S5 C51 100.26(16) .. ?  
S5 C51 H51A 109.5 .. ?  
S5 C51 H51B 109.5 .. ?  
H51A C51 H51B 109.5 .. ?  
S5 C51 H51C 109.5 .. ?  
H51A C51 H51C 109.5 .. ?  
H51B C51 H51C 109.5 .. ?  
S5 C52 H52A 109.5 .. ?  
S5 C52 H52B 109.5 .. ?

H52A C52 H52B 109.5 .. ?  
S5 C52 H52C 109.5 .. ?  
H52A C52 H52C 109.5 .. ?  
H52B C52 H52C 109.5 .. ?  
Sn1 C6 H6A 109.5 .. ?  
Sn1 C6 H6B 109.5 .. ?  
H6A C6 H6B 109.5 .. ?  
Sn1 C6 H6C 109.5 .. ?  
H6A C6 H6C 109.5 .. ?  
H6B C6 H6C 109.5 .. ?  
O13 C11 O12 110.2(2) .. ?  
O13 C11 O11 109.5(2) .. ?  
O12 C11 O11 108.7(2) .. ?  
O13 C11 O14 109.18(19) .. ?  
O12 C11 O14 108.1(2) .. ?  
O11 C11 O14 111.2(2) .. ?  
O24B C12 O23B 108.8(16) .. ?  
O24B C12 O21B 112.9(12) .. ?  
O23B C12 O21B 107.4(11) .. ?  
O24B C12 O22B 114.5(13) .. ?  
O23B C12 O22B 102.5(11) .. ?  
O21B C12 O22B 110.0(13) .. ?  
O21 C12 O23 112.5(7) .. ?  
O21 C12 O24 111.1(8) .. ?  
O23 C12 O24 111.7(8) .. ?  
O21 C12 O22 106.6(7) .. ?  
O23 C12 O22 104.8(5) .. ?  
O24 C12 O22 109.9(7) .. ?  
O32 C13 O34 110.9(11) .. ?  
O32 C13 O31 104.3(10) .. ?  
O34 C13 O31 113.6(13) .. ?  
O32 C13 O33 117.7(12) .. ?  
O34 C13 O33 106.1(10) .. ?  
O31 C13 O33 104.4(12) .. ?  
O32B C13 O34B 109.5(10) .. ?  
O32B C13 O33B 114.3(10) .. ?  
O34B C13 O33B 108.6(6) .. ?  
O32B C13 O31B 106.4(7) .. ?  
O34B C13 O31B 108.5(6) .. ?  
O33B C13 O31B 109.4(7) .. ?

\_refine\_diff\_density\_max 0.400  
\_refine\_diff\_density\_min -0.317  
\_refine\_diff\_density\_rms 0.053

\_shelx\_res\_file  
;

TITL Pb4dmso\_0m in P2(1)/c  
sn4dmso\_0m.res

created by SHELXL-2016/6 at 15:50:17 on 16-Apr-2019  
CELL 0.71073 11.5300 15.2317 18.5219 90.000 100.511 90.000  
ZERR 4.00 0.0060 0.0079 0.0096 0.000 0.006 0.000  
LATT 1  
SYMM -x, y+1/2, -z+1/2

SFAC C H O S Cl Sn  
 UNIT 44 124 68 20 12 4  
 TEMP 23.000  
 ACTA  
 L.S. 24  
 FMAP 2  
 shel 99 0.82  
 omit -9 0 4  
 omit 4 4 0  
 omit -2 2 3  
 PLAN -20  
 BOND \$H  
 dfix 21 cl1 o11 cl1 o12 cl1 o13 cl1 o14  
 dfix 21 cl2 o21 cl2 o22 cl2 o23 cl2 o24  
 dfix 21 cl2 o21b cl2 o22b cl2 o23b cl2 o24b  
 dfix 21 cl3 o31 cl3 o32 cl3 o33 cl3 o34  
 dfix 21 cl3 o31b cl3 o32b cl3 o33b cl3 o34b  
 dfix 21.633 0.05 o11 o12 o11 o13 o11 o14 o12 o13 o12 o14 o13 o14  
 dfix 21.633 0.05 o21 o22 o21 o23 o21 o24 o22 o23 o22 o24 o23 o24  
 dfix 21.633 0.05 o21b o22b o21b o23b o21b o24b o22b o23b o22b o24b o23b o24b  
 dfix 21.633 0.05 o31 o32 o31 o33 o31 o34 o32 o33 o32 o34 o33 o34  
 dfix 21.633 0.05 o31b o32b o31b o33b o31b o34b o32b o33b o32b o34b o33b o34b  
 DELU 0.01 0.02 cl2 o21b cl2 o22b cl2 o23b cl2 o24b  
 DELU 0.01 0.02 cl3 o31 cl3 o32 cl3 o33 cl3 o34  
 DELU 0.01 0.02 cl3 o31b cl3 o32b cl3 o33b cl3 o34b  
 WGHT 0.036100 1.327700  
 FVAR 0.05551 1.35719 0.43267 0.62655  
 SN1 6 0.679449 0.272984 0.815745 11.00000 0.04208 0.04120 =  
 0.04101 -0.00053 0.00925 -0.00118  
 O1 3 0.850954 0.314887 0.806806 11.00000 0.04578 0.06758 =  
 0.04497 -0.00390 0.01393 -0.00979  
 S1 4 0.919814 0.290023 0.745515 11.00000 0.05260 0.07490 =  
 0.04497 -0.00128 0.01666 -0.00603  
 C11 1 1.016655 0.379483 0.748787 11.00000 0.08960 0.09917 =  
 0.12098 0.00389 0.05163 -0.03332  
 AFIX 137  
 H11A 2 0.972173 0.432179 0.735536 11.00000 -1.50000  
 H11B 2 1.069380 0.369857 0.714996 11.00000 -1.50000  
 H11C 2 1.061365 0.385329 0.797619 11.00000 -1.50000  
 AFIX 0  
 C12 1 1.017683 0.207529 0.784767 11.00000 0.06735 0.09678 =  
 0.10431 0.00934 0.02666 0.01596  
 AFIX 137  
 H12A 2 1.059605 0.226965 0.831630 11.00000 -1.50000  
 H12B 2 1.072839 0.195255 0.753020 11.00000 -1.50000  
 H12C 2 0.974127 0.155254 0.791119 11.00000 -1.50000  
 AFIX 0  
 O2 3 0.747886 0.145714 0.835254 11.00000 0.08460 0.04791 =  
 0.05808 0.00702 0.02932 0.01620  
 S2 4 0.750419 0.087365 0.903121 11.00000 0.07250 0.05064 =  
 0.05347 0.00570 0.01707 0.01135  
 C21 1 0.882294 0.028289 0.905679 11.00000 0.09105 0.08787 =  
 0.12829 0.03191 0.03094 0.03942  
 AFIX 137  
 H21A 2 0.884059 0.004271 0.857972 11.00000 -1.50000

|      |     |          |           |          |          |          |           |
|------|-----|----------|-----------|----------|----------|----------|-----------|
| H21B | 2   | 0.886373 | -0.018519 | 0.940760 | 11.00000 | -1.50000 |           |
| H21C | 2   | 0.948381 | 0.066892  | 0.919699 | 11.00000 | -1.50000 |           |
| AFIX | 0   |          |           |          |          |          |           |
| C22  | 1   | 0.647905 | 0.003968  | 0.873866 | 11.00000 | 0.10536  | 0.07481 = |
|      |     | 0.10200  | 0.01159   | 0.01110  | -0.01589 |          |           |
| AFIX | 137 |          |           |          |          |          |           |
| H22A | 2   | 0.569493 | 0.027548  | 0.867620 | 11.00000 | -1.50000 |           |
| H22B | 2   | 0.656649 | -0.041933 | 0.909972 | 11.00000 | -1.50000 |           |
| H22C | 2   | 0.661411 | -0.019401 | 0.827979 | 11.00000 | -1.50000 |           |
| AFIX | 0   |          |           |          |          |          |           |
| O3   | 3   | 0.611239 | 0.399910  | 0.817767 | 11.00000 | 0.05355  | 0.04542 = |
|      |     | 0.06833  | -0.00223  | 0.00352  | 0.00653  |          |           |
| S3   | 4   | 0.674996 | 0.485113  | 0.847589 | 11.00000 | 0.05752  | 0.04561 = |
|      |     | 0.06914  | -0.00275  | 0.00667  | 0.00469  |          |           |
| C31  | 1   | 0.603424 | 0.563672  | 0.785317 | 11.00000 | 0.11811  | 0.05624 = |
|      |     | 0.08019  | 0.00822   | 0.00838  | 0.01336  |          |           |
| AFIX | 137 |          |           |          |          |          |           |
| H31A | 2   | 0.626257 | 0.555666  | 0.738435 | 11.00000 | -1.50000 |           |
| H31B | 2   | 0.625399 | 0.621521  | 0.803380 | 11.00000 | -1.50000 |           |
| H31C | 2   | 0.519565 | 0.556692  | 0.780159 | 11.00000 | -1.50000 |           |
| AFIX | 0   |          |           |          |          |          |           |
| C32  | 1   | 0.613687 | 0.510826  | 0.924860 | 11.00000 | 0.10665  | 0.07700 = |
|      |     | 0.06944  | -0.01707  | 0.01905  | 0.00354  |          |           |
| AFIX | 137 |          |           |          |          |          |           |
| H32A | 2   | 0.529258 | 0.512062  | 0.911400 | 11.00000 | -1.50000 |           |
| H32B | 2   | 0.641613 | 0.567321  | 0.943387 | 11.00000 | -1.50000 |           |
| H32C | 2   | 0.636603 | 0.467182  | 0.962125 | 11.00000 | -1.50000 |           |
| AFIX | 0   |          |           |          |          |          |           |
| O4   | 3   | 0.537492 | 0.227951  | 0.862110 | 11.00000 | 0.05423  | 0.05889 = |
|      |     | 0.06696  | -0.00856  | 0.02498  | -0.01118 |          |           |
| S4   | 4   | 0.482255 | 0.274756  | 0.921413 | 11.00000 | 0.06074  | 0.07312 = |
|      |     | 0.08817  | -0.01868  | 0.03619  | -0.01357 |          |           |
| C41  | 1   | 0.501881 | 0.197783  | 0.994092 | 11.00000 | 0.09903  | 0.17193 = |
|      |     | 0.07177  | 0.01672   | 0.03744  | 0.00981  |          |           |
| AFIX | 137 |          |           |          |          |          |           |
| H41A | 2   | 0.470508 | 0.141978  | 0.975982 | 11.00000 | -1.50000 |           |
| H41B | 2   | 0.461330 | 0.217786  | 1.031911 | 11.00000 | -1.50000 |           |
| H41C | 2   | 0.584460 | 0.191797  | 1.013840 | 11.00000 | -1.50000 |           |
| AFIX | 0   |          |           |          |          |          |           |
| C42  | 1   | 0.330246 | 0.262980  | 0.887764 | 11.00000 | 0.05825  | 0.08841 = |
|      |     | 0.14296  | 0.00859   | 0.03318  | 0.00868  |          |           |
| AFIX | 137 |          |           |          |          |          |           |
| H42A | 2   | 0.309119 | 0.295465  | 0.842873 | 11.00000 | -1.50000 |           |
| H42B | 2   | 0.286675 | 0.285015  | 0.923397 | 11.00000 | -1.50000 |           |
| H42C | 2   | 0.311981 | 0.202035  | 0.878656 | 11.00000 | -1.50000 |           |
| AFIX | 0   |          |           |          |          |          |           |
| O5   | 3   | 0.749550 | 0.303654  | 0.925124 | 11.00000 | 0.04792  | 0.06255 = |
|      |     | 0.04046  | -0.00511  | 0.00835  | 0.00172  |          |           |
| S5   | 4   | 0.879200 | 0.286630  | 0.963424 | 11.00000 | 0.04974  | 0.06160 = |
|      |     | 0.04223  | -0.00191  | 0.00641  | 0.00248  |          |           |
| C51  | 1   | 0.861569 | 0.263501  | 1.054414 | 11.00000 | 0.07954  | 0.08917 = |
|      |     | 0.04128  | 0.00715   | 0.00802  | -0.00348 |          |           |
| AFIX | 137 |          |           |          |          |          |           |
| H51A | 2   | 0.810018 | 0.306284  | 1.069843 | 11.00000 | -1.50000 |           |
| H51B | 2   | 0.937018 | 0.265647  | 1.086450 | 11.00000 | -1.50000 |           |



H51C 2 0.828104 0.206021 1.056317 11.00000 -1.50000  
AFIX 0  
C52 1 0.940177 0.393210 0.975161 11.00000 0.07057 0.07719 =  
0.07100 -0.00246 0.00367 -0.01833  
AFIX 137  
H52A 2 0.943112 0.418315 0.927987 11.00000 -1.50000  
H52B 2 1.018518 0.389943 1.003553 11.00000 -1.50000  
H52C 2 0.892035 0.429285 1.000322 11.00000 -1.50000  
AFIX 0  
C6 1 0.606851 0.253597 0.704509 11.00000 0.07123 0.06720 =  
0.05005 -0.00481 -0.00048 -0.01196  
AFIX 137  
H6A 2 0.522339 0.254548 0.698102 11.00000 -1.50000  
H6B 2 0.632131 0.197850 0.688796 11.00000 -1.50000  
H6C 2 0.632872 0.299523 0.675741 11.00000 -1.50000  
AFIX 0  
rem  
rem perchlorates  
rem  
CL1 5 0.243627 0.519094 0.859419 11.00000 0.07995 0.06635 =  
0.06736 0.00338 0.02036 0.00366  
O11 3 0.300527 0.470384 0.811949 11.00000 0.17208 0.12033 =  
0.13154 -0.01567 0.08961 0.00934  
O12 3 0.153256 0.568317 0.817414 11.00000 0.12653 0.12018 =  
0.13880 0.02071 -0.02540 0.02736  
O13 3 0.197079 0.462049 0.905884 11.00000 0.14637 0.11251 =  
0.09183 0.01046 0.04529 -0.02855  
O14 3 0.322923 0.578214 0.902492 11.00000 0.10539 0.09700 =  
0.11886 -0.00571 0.00624 -0.01457  
  
CL2 5 0.245435 -0.005313 0.890956 11.00000 0.08869 0.05916 =  
0.07547 0.00497 0.01946 -0.00295  
part 1  
O21 3 0.201901 0.062908 0.852083 41.00000 0.27140 0.08177 =  
0.20480 0.06639 0.01082 0.03220  
O22 3 0.156021 -0.036251 0.926940 41.00000 0.14322 0.16220 =  
0.18920 0.06764 0.09276 0.02955  
O23 3 0.268210 -0.073393 0.848402 41.00000 0.20538 0.11422 =  
0.27749 -0.09409 0.11068 -0.00146  
O24 3 0.342574 0.017349 0.941404 41.00000 0.15936 0.23321 =  
0.19977 -0.03831 -0.04736 -0.03134  
part 2  
O21B 3 0.212850 0.045941 0.942824 -41.00000 0.29770 0.20591 =  
0.21779 -0.06973 0.17861 0.00000  
O22B 3 0.199261 0.025837 0.823556 -41.00000 0.14985 0.33994 =  
0.11299 0.12605 -0.01045 -0.06678  
O23B 3 0.360042 0.006128 0.894103 -41.00000 0.07693 0.40407 =  
0.15458 -0.06739 0.01814 -0.03180  
O24B 3 0.225905 -0.086145 0.900065 -41.00000 0.37762 0.06789 =  
0.26538 0.06687 0.06719 -0.02290  
part 0  
CL3 5 0.204000 0.249352 0.596435 11.00000 0.06916 0.07108 =  
0.11831 0.00235 0.04237 0.00076  
part 1  
O31 3 0.150570 0.201031 0.641009 31.00000 0.14254 0.29978 =

0.14643 0.08863 0.07854 -0.03075  
O32 3 0.229084 0.192408 0.547312 31.00000 0.30265 0.14437 =  
0.22448 -0.08276 0.15088 -0.00831  
O33 3 0.126596 0.313251 0.572642 31.00000 0.12087 0.09122 =  
0.34853 0.04942 0.05984 0.04105  
O34 3 0.301704 0.289503 0.630859 31.00000 0.11496 0.16457 =  
0.35530 -0.07304 -0.01991 -0.04311

part 2

O31B 3 0.161220 0.167628 0.613788 -31.00000 0.09019 0.09249 =  
0.17078 0.04516 -0.02134 -0.03012  
O32B 3 0.191266 0.302819 0.650450 -31.00000 0.42448 0.18347 =  
0.30446 -0.12187 0.25591 -0.04146  
O33B 3 0.144740 0.275619 0.527989 -31.00000 0.12625 0.24431 =  
0.17449 0.13176 0.01038 0.00484  
O34B 3 0.320870 0.240955 0.593658 -31.00000 0.06339 0.17099 =  
0.15638 0.05110 0.05022 -0.00141

part 0

HKLF 4 1 1 0 0 0 1 0 0 0 1

REM Pb4dmso\_0m in P2(1)/c

REM R1 = 0.0262 for 5183 Fo > 4sig(Fo) and 0.0332 for all 6063 data

REM 420 parameters refined using 80 restraints

END

WGHT 0.0360 1.3265

REM Highest difference peak 0.400, deepest hole -0.317, 1-sigma level 0.053

Q1 1 0.3275 -0.0531 0.9231 11.00000 0.05 0.40  
Q2 1 0.1303 0.5289 0.8679 11.00000 0.05 0.37  
Q3 1 0.3157 0.0614 0.8713 11.00000 0.05 0.35  
Q4 1 0.1335 0.0203 0.8909 11.00000 0.05 0.33  
Q5 1 0.7088 0.2172 0.8276 11.00000 0.05 0.30  
Q6 1 0.4494 0.2955 0.8790 11.00000 0.05 0.29  
Q7 1 0.2165 0.5206 0.7898 11.00000 0.05 0.27  
Q8 1 0.2263 -0.0422 0.8186 11.00000 0.05 0.26  
Q9 1 0.8572 0.2681 0.8129 11.00000 0.05 0.25  
Q10 1 0.3333 0.4543 0.8637 11.00000 0.05 0.24  
Q11 1 0.2914 0.0351 0.9694 11.00000 0.05 0.23  
Q12 1 0.1535 0.2218 0.5175 11.00000 0.05 0.23  
Q13 1 0.3830 0.0221 0.8994 11.00000 0.05 0.23  
Q14 1 0.1735 0.0108 0.9602 11.00000 0.05 0.23  
Q15 1 0.7763 0.2756 0.8151 11.00000 0.05 0.23  
Q16 1 0.7035 0.0474 0.8959 11.00000 0.05 0.22  
Q17 1 0.9007 0.3440 0.8160 11.00000 0.05 0.22  
Q18 1 0.1306 0.2834 0.6352 11.00000 0.05 0.21  
Q19 1 0.2564 0.2528 0.6918 11.00000 0.05 0.21  
Q20 1 1.0686 0.2540 0.8240 11.00000 0.05 0.21

;

\_shelx\_res\_checksum 74623

**Table S3b.** Basic crystallographic information for **2**.

|                        |                                                                                                                  |
|------------------------|------------------------------------------------------------------------------------------------------------------|
| Unit formula           | $\text{Sn}_2(\text{SH})_2(\text{C}_2\text{H}_7\text{NS})_8, 4 \text{CF}_3\text{SO}_3^-, 2 \text{HS}^-$ (approx.) |
| Crystal system         | Triclinic                                                                                                        |
| Space group            | $P-1$ (No 2)                                                                                                     |
| $a/\text{\AA}$         | 10.46(1)                                                                                                         |
| $b/\text{\AA}$         | 13.06 (1)                                                                                                        |
| $c/\text{\AA}$         | 16.52 (1)                                                                                                        |
| $\alpha/^\circ$        | 98.51(2)                                                                                                         |
| $\beta/^\circ$         | 99.72(2)                                                                                                         |
| $\gamma/^\circ$        | 103.45(2)                                                                                                        |
| $V/\text{\AA}^3$       | 2121(3)                                                                                                          |
| $Z$                    | 2                                                                                                                |
| $D_s/\text{g cm}^{-3}$ | 1.5 (est.)                                                                                                       |
| $\mu/\text{mm}^{-1}$   | 1.1 (est.)                                                                                                       |

**Table S4.** Summary of mean M-O bond distances in other six-coordinate, high-valent d<sup>10</sup> ions (mononuclear, neutral solvates). The given refcode refers to the respective structure's CSD (letters; ref. 3) or ICSD (numbers; ref. 4.) entry.

*a) Gallium(III)*

*Six-coordination*

Water

|          |         |                                                                                                                                                                                                    |
|----------|---------|----------------------------------------------------------------------------------------------------------------------------------------------------------------------------------------------------|
| NABZIA   | 1.946 Å | S. J. Dalgarno, M. J. Hardie and C. L. Raston, <i>Cryst. Growth Des.</i> 2004, <b>4</b> , 227-234. [Ga(H <sub>2</sub> O) <sub>6</sub> ] <sup>3+</sup>                                              |
| 260428   | 1.946 Å | A. D. Hendsbee, C. C. Pye and J. D. Masuda, <i>Acta Crystallogr., Sect. E</i> 2009, <b>65</b> , i65-i65. [Ga(H <sub>2</sub> O) <sub>6</sub> ] <sup>3+</sup>                                        |
| MAQKEV   | 1.950 Å | O. A. Gerasko, E. A. Mainicheva, D. Y. Naumov, N. V. Kuratieva, M. N. Sokolov and V. P. Fedin, <i>Inorg. Chem.</i> 2005, <b>44</b> , 4133-4135. [Ga(H <sub>2</sub> O) <sub>6</sub> ] <sup>3+</sup> |
| REZKOJ01 | 1.950 Å | A. Pietraszko, K. Lukaszewicz and L. F. Kirpichnikova, <i>Pol. J. Chem.</i> 1995, <b>69</b> , 922-930 (ICSD #110542). [Ga(H <sub>2</sub> O) <sub>6</sub> ] <sup>3+</sup>                           |
| REZKOJ   | 1.951 Å | A. Pietraszko, K. Lukaszewicz and L. F. Kirpichnikova, <i>Pol. J. Chem.</i> 1995, <b>69</b> , 922-930 (ICSD #110541). [Ga(H <sub>2</sub> O) <sub>6</sub> ] <sup>3+</sup>                           |
| 83654    | 1.969 Å | K. Panneerselvam, M. Soriano-Garcia, S. Holguin-Quinones and E. M. Holt, <i>Acta Crystallogr., Sect. C</i> 1996, <b>52</b> , 1605-1607. [Ga(H <sub>2</sub> O) <sub>6</sub> ] <sup>3+</sup>         |

Dimethylsulfoxide (dmsO)

|          |         |                                                                                                                                                                                    |
|----------|---------|------------------------------------------------------------------------------------------------------------------------------------------------------------------------------------|
| FALWAR01 | 1.962 Å | E. J Chan, B. G. Cox, J. M. Harrowfield, M. I. Ogden, B. W. Skelton and A. H. White, <i>Inorg. Chim. Acta</i> 2004, <b>357</b> , 2365-2373. [Ga(dmsO) <sub>6</sub> ] <sup>3+</sup> |
| FALWAR   | 1.964 Å | E. J Chan, B. G. Cox, J. M. Harrowfield, M. I. Ogden, B. W. Skelton and A. H. White, <i>Inorg. Chim. Acta</i> 2004, <b>357</b> , 2365-2373. [Ga(dmsO) <sub>6</sub> ] <sup>3+</sup> |
| VAMNIH   | 1.974 Å | A. Molla-Abbassi, M. Skripkin, M. Kritikos, I. Persson, J. Mink and M. Sandström, <i>Dalton Trans.</i> 2003, 1746-1753 (ICSD #414686). [Ga(dmsO) <sub>6</sub> ] <sup>3+</sup>      |

Dimethylformamide (dmf)

|        |         |                                                                                                                            |
|--------|---------|----------------------------------------------------------------------------------------------------------------------------|
| FEGSUG | 1.960 Å | T. Duan and H. Schnockel, <i>Z. Anorg. Allg. Chem.</i> 2004, <b>630</b> , 2622-2626. [Ga(dmf) <sub>6</sub> ] <sup>3+</sup> |
|--------|---------|----------------------------------------------------------------------------------------------------------------------------|

Urea

PAPWIN 1.954 Å K. Sardar, M. Dan, B. Schwenzer and C. N. R. Rao, *J. Mater. Chem.* 2005, **15**, 2175-2177. [Ga(urea)<sub>6</sub>]<sup>3+</sup>

Mean six-coordinate Ga-O bond distance: **1.957(9)** Å (11 structures)

b) Indium(III)

*Six-coordination*

Water

UHORUG 2.082 Å M. K. Kamunde-Devonish, D. B. Fast, Z. L. Mensinger, J. T. Gatlin, L. N. Zakharov, M. R. Dolgos and D. W. Johnson, *Inorg. Chem.* 2015, **54**, 3913-3920. [outer part-tetraaquadihydroxoindium(III)]

OLURUI 2.110 Å Y.-Q. Tian, C.-X. Cai, X.-J. Yuan, Y.-Z. Li, T.-W. Wang and X.-Z. You, *Chem. Lett.* 2003, **32**, 796-797. [partially occupied metal center, In:Fe 70:30]

417334 2.106 Å A. B. Ilyukhin and M. A. Malyarik, *Zh. Neorg. Khim.* 1999, **44**, 532-535. [In(H<sub>2</sub>O)<sub>6</sub>]<sup>3+</sup>

429698 2.117 Å N.-D. Van, F. M. Kleeberg and T. Schleid, *Z. Anorg. Allg. Chem.* 2015, **641**, 2484-2489. [In(H<sub>2</sub>O)<sub>6</sub>]<sup>3+</sup>

417333 2.124 Å A. B. Ilyukhin and M. A. Malyarik, *Zh. Neorg. Khim.* 1999, **44**, 532-535. [In(H<sub>2</sub>O)<sub>6</sub>]<sup>3+</sup>

UHOROA 2.132 Å M. K. Kamunde-Devonish, D. B. Fast, Z. L. Mensinger, J. T. Gatlin, L. N. Zakharov, M. R. Dolgos and D. W. Johnson, *Inorg. Chem.* 2015, **54**, 3913-3920. [outer part-tetraaquadihydroxoindium(III)]

NONDUQ 2.139 Å Z. L. Mensinger, J. T. Gatlin, S. T. Meyers, L. N. Zakharov, D. A. Keszler and D. W. Johnson, *Angew. Chem., Int.Ed.* 2008, **47**, 9484-9486. [outer part-tetraaquadihydroxoindium(III)]

UHORIU 2.139 Å M. K. Kamunde-Devonish, D. B. Fast, Z. L. Mensinger, J. T. Gatlin, L. N. Zakharov, M. R. Dolgos and D. W. Johnson, *Inorg. Chem.* 2015, **54**, 3913-3920. [outer part-tetraaquadihydroxoindium(III)]

OLURUI01 2.141 Å Y.-Q. Tian, C.-X. Cai, X.-J. Yuan, Y.-Z. Li, T.-W. Wang and X.-Z. You, *Chem. Lett.* 2003, **32**, 796-797. [In(H<sub>2</sub>O)<sub>6</sub>]<sup>3+</sup>

GUMWIU 2.144 Å D. G. Samsonenko, M. N. Sokolov, A. V. Virovets, N. V. Pervukhina and V. P. Fedin, *Eur. J. Inorg. Chem.* 2001, 167-172. [In(H<sub>2</sub>O)<sub>6</sub>]<sup>3+</sup>

Dimethylsulfoxide (dmsO)/water

IMISEC 2.124 Å T. G. Cherkasova and I. P. Goryunova, *Zh. Neorg. Khim.* 2003, **48**, 611-615 (ICSD #98755). [In(H<sub>2</sub>O)<sub>4</sub>(dmsO)<sub>2</sub>]<sup>3+</sup>

Dimethylsulfoxide (dmsO)

|          |         |                                                                                                                                                                               |
|----------|---------|-------------------------------------------------------------------------------------------------------------------------------------------------------------------------------|
| KENRIE01 | 2.131 Å | T. G. Cherkasova and Z. S. Tatarinova, <i>Izv. Vyssh. Uchebn. Zaved.</i> 1997, <b>40</b> , 26. [In(dmsO) <sub>6</sub> ] <sup>3+</sup>                                         |
| KENRIE   | 2.140 Å | J. M. Harrowfield, B. W. Skelton and A. H. White, <i>Aust. J. Chem.</i> 1990, <b>43</b> , 759-763. [In(dmsO) <sub>6</sub> ] <sup>3+</sup>                                     |
| VAMNON   | 2.145 Å | A. Molla-Abbassi, M. Skripkin, M. Kritikos, I. Persson, J. Mink and M. Sandström, <i>Dalton Trans.</i> 2003, 1746-1753 (ICSD #414687). [In(dmsO) <sub>6</sub> ] <sup>3+</sup> |

Mean six-coordinate In-O bond distance: **2.130(9)** Å (9 structures)

c) *Thallium(III)*

*Six-coordination*

Water

|     |         |                                                                                                                                                                                                                                                                                                     |
|-----|---------|-----------------------------------------------------------------------------------------------------------------------------------------------------------------------------------------------------------------------------------------------------------------------------------------------------|
| n/a | 2.235 Å | J. Glaser and G. Johansson, <i>Acta Chem. Scand., Ser. A</i> 1981, <b>35</b> , 639-644. [Tl(H <sub>2</sub> O) <sub>6</sub> ] <sup>3+</sup> [note: solution state LAXS measurement, as the crystal structure is reported as 2.170 Å for #31759 in ICSD, though given as 2.23(5) Å in this reference] |
|-----|---------|-----------------------------------------------------------------------------------------------------------------------------------------------------------------------------------------------------------------------------------------------------------------------------------------------------|

Dimethylsulfoxide (dmsO)

|          |         |                                                                                                                                                                                                                                                                  |
|----------|---------|------------------------------------------------------------------------------------------------------------------------------------------------------------------------------------------------------------------------------------------------------------------|
| n/a      | 2.221 Å | G. Ma, A. Molla-Abbassi, M. Kritikos, A. Ilyukhin, F. Jalilehvand, V. G. Kessler, M. Skripkin, M. Sandström, J. Glaser, J. Näslund, I. Persson, <i>Inorg. Chem.</i> 2001, <b>40</b> , 6432-6438. [Tl(dmsO) <sub>6</sub> ] <sup>3+</sup> (solid state EXAFS data) |
| NERWAI01 | 2.224 Å | G. Ma, A. Molla-Abbassi, M. Kritikos, A. Ilyukhin, F. Jalilehvand, V. G. Kessler, M. Skripkin, M. Sandström, J. Glaser, J. Näslund, I. Persson, <i>Inorg. Chem.</i> 2001, <b>40</b> , 6432-6438. [Tl(dmsO) <sub>6</sub> ] <sup>3+</sup>                          |
| QUXRAD   | 2.224 Å | M. Ghadermazi and F. Manteghi, <i>Acta Crystallogr., Sect. E</i> 2010, <b>66</b> , m812-m812. [Tl(dmsO) <sub>6</sub> ] <sup>3+</sup>                                                                                                                             |
| NERWAI   | 2.240 Å | G. Ma, A. Molla-Abbassi, M. Kritikos, A. Ilyukhin, F. Jalilehvand, V. G. Kessler, M. Skripkin, M. Sandström, J. Glaser, J. Näslund, I. Persson, <i>Inorg. Chem.</i> 2001, <b>40</b> , 6432-6438. [Tl(dmsO) <sub>6</sub> ] <sup>3+</sup>                          |

Mean six-coordinate Tl-O bond distance: **2.229(8)** Å (5 structures)

d) *Germanium(IV)*

no hydrates or solvates reported

*e) Lead(IV)*

*no hydrates or solvates reported*

**Table S5.** Summary of mean M-O bond distances in other six-coordinate, high-valent d<sup>10</sup> ions (hydroxides). The given refcode refers to the respective structure's CSD (letters; ref. 3), ICSD (numbers; ref. 4.) or COD (*numbers in italics*; ref. 5) entry.

*a) Gallium(III)*

*Four-coordination – tetrahydroxidogallate(III)*

|            |         |                                                                                                                                                                                                                                                   |
|------------|---------|---------------------------------------------------------------------------------------------------------------------------------------------------------------------------------------------------------------------------------------------------|
| <i>n/a</i> | 1.83 Å  | T. Radnai, S. Bálint, I. Bakó, T. Megyes, T. Grósz, A. Pallagi, G. Peintler, I. Pálinko and P. Sipos, <i>Phys. Chem. Chem. Phys.</i> 2014, <b>16</b> , 4023-4032. [Ga(OH) <sub>4</sub> ] <sup>-</sup> [ <i>note</i> : solution state measurement] |
| TEHPUS     | 1.955 Å | M. Albrecht, S. Dehn and R. Frohlich, <i>Angew. Chem., Int. Ed.</i> 2006, <b>45</b> , 2792-2794. (μ-hydroxido) [Ga(OH) <sub>4</sub> ] <sup>-</sup>                                                                                                |

*Six-coordination - hexahydroxidogallate(III)*

|                |         |                                                                                                                                                                                                                                                                            |
|----------------|---------|----------------------------------------------------------------------------------------------------------------------------------------------------------------------------------------------------------------------------------------------------------------------------|
| 240927         | 1.966 Å | Z. L. Mensinger, L. N. Zakharov and D. W. Johnson, <i>Acta Crystallogr., Sect. E</i> 2008, <b>64</b> , pi8-pi9. [Ga(OH) <sub>6</sub> ] <sup>3-</sup> (μ-hydroxido)                                                                                                         |
| XEJFAV         | 1.969 Å | S. Himeno, S. Murata and K. Eda, <i>Dalton Trans.</i> 2009, 6114-6119. [Ga(OH) <sub>6</sub> ] <sup>3-</sup>                                                                                                                                                                |
| UHOREQ         | 1.970 Å | M. K. Kamunde-Devonish, D. B. Fast, Z. L. Mensinger, J. T. Gatlin, L. N. Zakharov, M. R. Dolgos and D. W. Johnson, <i>Inorg. Chem.</i> 2015, <b>54</b> , 3913-3920. [Ga(OH) <sub>6</sub> ] <sup>3-</sup> [inner part-hexahydroxidogallium(III)] (also UHOSAN and UHOSER)   |
| NONDUQ         | 1.973 Å | Z. L. Mensinger, J. T. Gatlin, S. T. Meyers, L. N. Zakharov, D. A. Keszler and D. W. Johnson, <i>Angew. Chem., Int. Ed.</i> 2008, <b>47</b> , 9484-9486. [Ga(OH) <sub>6</sub> ] <sup>3-</sup> (μ-hydroxido)                                                                |
| UHORIU         | 1.973 Å | M. K. Kamunde-Devonish, D. B. Fast, Z. L. Mensinger, J. T. Gatlin, L. N. Zakharov, M. R. Dolgos and D. W. Johnson, <i>Inorg. Chem.</i> 2015, <b>54</b> , 3913-3920. [Ga(OH) <sub>6</sub> ] <sup>3-</sup> [inner part-hexahydroxidogallium(III)] (also UHOROA and UHORUG)   |
| PIVJIN         | 1.980 Å | F. Rominger, A. Müller and U. Thewalt, <i>Chem. Ber.</i> 1994, <b>127</b> , 797-804. [Ga(OH) <sub>6</sub> ] <sup>3-</sup> (μ-hydroxido)                                                                                                                                    |
| 51891          | 1.983 Å | I. Rousselot, C. Taviot-Gueho, F. Leroux, P. Leone, P. Palvadeau and J. P. Besse, <i>J. Solid State Chem.</i> 2002, <b>167</b> , 137-144. [Ga(OH) <sub>6</sub> ] <sup>3-</sup> (μ-hydroxido)                                                                               |
| <i>8103865</i> | 2.004 Å | M. Loeper, W. Gessner, M. Schneider and G. Reck, <i>Z. Kristallogr.</i> 1996, <b>211</b> , 709-710. Na <sub>6</sub> (Ga(OH) <sub>6</sub> ) <sub>2</sub> (OH) <sub>3</sub> ·6 H <sub>2</sub> O                                                                              |
| UHOREQ*        | 2.052 Å | M. K. Kamunde-Devonish, D. B. Fast, Z. L. Mensinger, J. T. Gatlin, L. N. Zakharov, M. R. Dolgos and D. W. Johnson, <i>Inorg. Chem.</i> 2015, <b>54</b> , 3913-3920. [Ga(OH) <sub>6</sub> ] <sup>3-</sup> [outer part-hexahydroxidogallium(III)] (also UHOSAN* and UHOSER*) |

*Mean six-coordinate Ga-OH bond distance: 1.973(6) Å (7 structures)*



b) Indium(III)

Six-coordination – hexahydroxidoindate(III)

|        |         |                                                                                                                                                                                                                          |
|--------|---------|--------------------------------------------------------------------------------------------------------------------------------------------------------------------------------------------------------------------------|
| UHORUG | 2.082 Å | M. K. Kamunde-Devonish, D. B. Fast, Z. L. Mensinger, J. T. Gatlin, L. N. Zakharov, M. R. Dolgos and D. W. Johnson, <i>Inorg. Chem.</i> 2015, <b>54</b> , 3913-3920. [outer part-tetraaquadihydroxidoindium(III)]         |
| PIVKAG | 2.117 Å | F. Rominger, A. Müller and U. Thewalt, <i>Chem. Ber.</i> 1994, <b>127</b> , 797-804. ( $\mu$ -hydroxido)                                                                                                                 |
| UHOROA | 2.132 Å | M. K. Kamunde-Devonish, D. B. Fast, Z. L. Mensinger, J. T. Gatlin, L. N. Zakharov, M. R. Dolgos and D. W. Johnson, <i>Inorg. Chem.</i> 2015, <b>54</b> , 3913-3920. [outer part-tetraaquadihydroxidoindium(III)]         |
| NONDUQ | 2.139 Å | Z. L. Mensinger, J. T. Gatlin, S. T. Meyers, L. N. Zakharov, D. A. Keszler and D. W. Johnson, <i>Angew. Chem., Int.Ed.</i> 2008, <b>47</b> , 9484-9486. ( $\mu$ -hydroxido) [outer part-tetraaquadihydroxidoindium(III)] |
| UHORIU | 2.139 Å | M. K. Kamunde-Devonish, D. B. Fast, Z. L. Mensinger, J. T. Gatlin, L. N. Zakharov, M. R. Dolgos and D. W. Johnson, <i>Inorg. Chem.</i> 2015, <b>54</b> , 3913-3920. [outer part-tetraaquadihydroxidoindium(III)]         |
| PIVJUZ | 2.152 Å | F. Rominger, A. Müller and U. Thewalt, <i>Chem. Ber.</i> 1994, <b>127</b> , 797-804. [ $\text{In}(\text{OH})_6$ ] <sup>3-</sup> ( $\mu$ -hydroxido)                                                                      |
| IGEHL  | 2.167 Å | S. Chitsaz, T. Breyhan, J. Pauls and B. Neumüller, <i>Z. Anorg. Allg. Chem.</i> 2002, <b>628</b> , 956-964. [ $\text{In}(\text{OH})_6$ ] <sup>3-</sup>                                                                   |

Mean six-coordinate In-OH bond distance: **2.160(11) Å** (2 structures)

c) Thallium(III)

Six-coordination – hexahydroxidothallate(III)

|        |         |                                                                                                                    |
|--------|---------|--------------------------------------------------------------------------------------------------------------------|
| 411058 | 2.257 Å | D. Hinz, <i>Z. Anorg. Allg. Chem.</i> 2000, <b>626</b> , 1012-1015. $\text{Ba}_2[\text{Tl}(\text{OH})_6]\text{OH}$ |
|--------|---------|--------------------------------------------------------------------------------------------------------------------|

d) Germanium(IV)

Six-coordination – hexahydroxidogermanate(IV)

|        |         |                                                                                                                                                            |
|--------|---------|------------------------------------------------------------------------------------------------------------------------------------------------------------|
| VEGWEL | 1.797 Å | A. K. Inge, J. Sun; F. Moraga, B. Guo and X. Zou, <i>CrystEngComm</i> 2012, <b>14</b> , 5465-5471.                                                         |
| 27650  | 1.806 Å | J. Zemmann, <i>Neu. Jb. Mineral. Mh.</i> 1959, 67-69.                                                                                                      |
| 187162 | 1.897 Å | A. K. Kleppe, M. D. Welch, W. A. Crichton and A. P. Jephcoat, <i>Mineralog. Mag.</i> 2012, <b>76</b> , 949-962. [ $\text{Ge}(\text{OH})_6$ ] <sup>2-</sup> |

|        |         |                                                                                                                                                                                            |
|--------|---------|--------------------------------------------------------------------------------------------------------------------------------------------------------------------------------------------|
| 187161 | 1.899 Å | A. K. Kleppe, M. D. Welch, W. A. Crichton and A. P. Jephcoat, <i>Mineralog. Mag.</i> 2012, <b>76</b> , 949-962. [Ge(OH) <sub>6</sub> ] <sup>2-</sup>                                       |
| 4295   | 1.900 Å | H. H. Otto, <i>Neu. Jb. Mineral. Abh.</i> 1975, <b>123</b> , 160-190. [Ge(OH) <sub>6</sub> ] <sup>2-</sup>                                                                                 |
| NOHHOI | 1.913 Å | F. Gándara, M. E. Medina, N. Snejko, B. Gómez-Lor, M. Iglesias, E. Gutiérrez-Puebla and M. A. Monge, <i>Inorg. Chem.</i> 2008, <b>47</b> , 6791-6795. [Ge(OH) <sub>6</sub> ] <sup>2-</sup> |
| 202596 | 1.914 Å | C. R. Ross, L. R. Bernstein and G. A. Waychunas, <i>Am. Mineralog.</i> 1988, <b>73</b> , 657-661. [Ge(OH) <sub>6</sub> ] <sup>2-</sup>                                                     |
| 15408  | 1.949 Å | H. Strunz and M. Giglio, <i>Acta Crystallogr.</i> 1961, <b>14</b> , 205-208.                                                                                                               |

Mean six-coordinate Ge-OH bond distance: **1.905(8)** Å (5 structures)

*Six-coordination – hexanitratogermanate(IV)*

|        |         |                                                                                                                                                        |
|--------|---------|--------------------------------------------------------------------------------------------------------------------------------------------------------|
| EXEHEW | 1.898 Å | P. Portius, B. Peerless, M. Davis and R. Campbell, <i>Inorg. Chem.</i> 2016, <b>55</b> , 8976-8984. [Ge(NO <sub>3</sub> ) <sub>6</sub> ] <sup>2-</sup> |
|--------|---------|--------------------------------------------------------------------------------------------------------------------------------------------------------|

*e) Lead(IV)*

*Six-coordination – hexahydroxidoplumbate(IV)*

|       |         |                                                                                                                                                                                                             |
|-------|---------|-------------------------------------------------------------------------------------------------------------------------------------------------------------------------------------------------------------|
| 15863 | 2.151 Å | C. Levy-Clement and Y. Billiet, <i>Bull. Soc. Fr. Mineral. Cristallogr.</i> 1976, <b>99</b> , 361-372. Ca[Pb(OH) <sub>6</sub> ]                                                                             |
| 39229 | 2.154 Å | A. M. Il'inets, B. N. Ivanov-Emin, B. E. Zaitsev, A. V. Kostrikin, N. A. Baturin, L. L. Regel' and V. P. Dolganev, <i>Kristallografiya</i> 1990, <b>35</b> , 491-492. K <sub>2</sub> [Pb(OH) <sub>6</sub> ] |
| 92466 | 2.158 Å | H. Jacobs and R. Stahl, <i>Z. Anorg. Allgem. Chem.</i> 2000, <b>626</b> , 1863-1866. K <sub>2</sub> [Pb(OH) <sub>6</sub> ]                                                                                  |
| 15862 | 2.170 Å | C. Levy-Clement and Y. Billiet, <i>Bull. Soc. Fr. Mineral. Cristallogr.</i> 1976, <b>99</b> , 361-372. Ca[Pb(OH) <sub>6</sub> ]                                                                             |

Mean six-coordinate Pb-OH bond distance: **2.158(8)** Å (4 structures)

**Table S6a.** Six-coordinate monomethyltin(IV) structures reported in CSD (ref. 8) with remaining ligand atoms oxygen, i.e. those with an CH<sub>3</sub>Sn<sup>IV</sup>O<sub>5</sub> core.

*Six-coordination*

|                    | $d(\text{Sn-CH}_3)/\text{\AA}$ | $\text{mean } d(\text{Sn-O})/\text{\AA}$ | $\text{mean } d(\text{Sn-O/C})/\text{\AA}$ | <i>Note</i>                        |
|--------------------|--------------------------------|------------------------------------------|--------------------------------------------|------------------------------------|
| JEBXAP             | 2.108                          | 2.094                                    | 2.096                                      |                                    |
| <b>1</b> (crystal) | 2.118                          | 2.098                                    | 2.101                                      | See full article for EXAFS results |
| VACKAL             | 2.154                          | 2.103                                    | 2.112                                      |                                    |
| WEYDUA             | 2.112                          | 2.114                                    | 2.114                                      |                                    |
| XEMPUB             | 2.103                          | 2.116                                    | 2.114                                      |                                    |
| GIBPIQ             | 2.129                          | 2.117                                    | 2.119                                      |                                    |
| GIBPEM             | 2.120                          | 2.118                                    | 2.118                                      |                                    |
| WEYDIO             | 2.143                          | 2.118                                    | 2.122                                      | <i>aka</i> WEYDOU                  |
| RADSAS             | 2.090                          | 2.121                                    | 2.116                                      |                                    |
| ZELPEN             | 2.108                          | 2.121                                    | 2.119                                      |                                    |
| <i>Mean</i>        | <i>2.119</i>                   | <i>2.112</i>                             | <i>2.113</i>                               |                                    |

**Table S6b.** Six-coordinate dimethyltin(IV) structures reported in CSD (ref. 8) with remaining ligand atoms oxygen, i.e. those with an  $(\text{CH}_3)_2\text{Sn}^{\text{IV}}\text{O}_4$  core; those with bidentate ligands excluded.

*Six-coordination*

|             | $d(\text{Sn}-\text{CH}_3)/\text{\AA}$ | $\text{mean } d(\text{Sn}-\text{O})/\text{\AA}$ | $\text{mean } d(\text{Sn}-\text{O}/\text{C})/\text{\AA}$ | <i>Note</i> |
|-------------|---------------------------------------|-------------------------------------------------|----------------------------------------------------------|-------------|
| BAXQIB      | 2.092                                 | 2.175                                           | 2.147                                                    |             |
| KURJOW      | 2.114                                 | 2.207                                           | 2.176                                                    | dmsO        |
| LAKNOA      | 2.089                                 | 2.218                                           | 2.175                                                    |             |
| SAFMET      | 2.094                                 | 2.219                                           | 2.177                                                    |             |
| GOMNUR      | 2.116                                 | 2.221                                           | 2.186                                                    |             |
| HEQCIP      | 2.096                                 | 2.227                                           | 2.183                                                    |             |
| DIDRAJ      | 2.094                                 | 2.232                                           | 2.186                                                    |             |
| KAJVAS      | 2.080                                 | 2.235                                           | 2.183                                                    |             |
| LEYFIE      | 2.093                                 | 2.243                                           | 2.193                                                    |             |
| ZAXCIM      | 2.095                                 | 2.243                                           | 2.194                                                    |             |
| SIFLEY      | 2.106                                 | 2.248                                           | 2.201                                                    |             |
| DMTFSU      | 2.064                                 | 2.271                                           | 2.202                                                    |             |
| <i>Mean</i> | <i>2.094</i>                          | <i>2.208</i>                                    | <i>2.170</i>                                             |             |

**Figure S1.** Unit cell packing of solid pentakis(dimethylsulfoxide)methyltin(IV) perchlorate,  $[\text{Sn}(\text{OS}(\text{CH}_3)_2)_5\text{CH}_3](\text{ClO}_4)_3$ , **1**. Thermal ellipsoids are set to 50 % probability. Hydrogens and the alternate positions of the oxygens for perchlorate anion 2 and 3 are not shown for clarity.

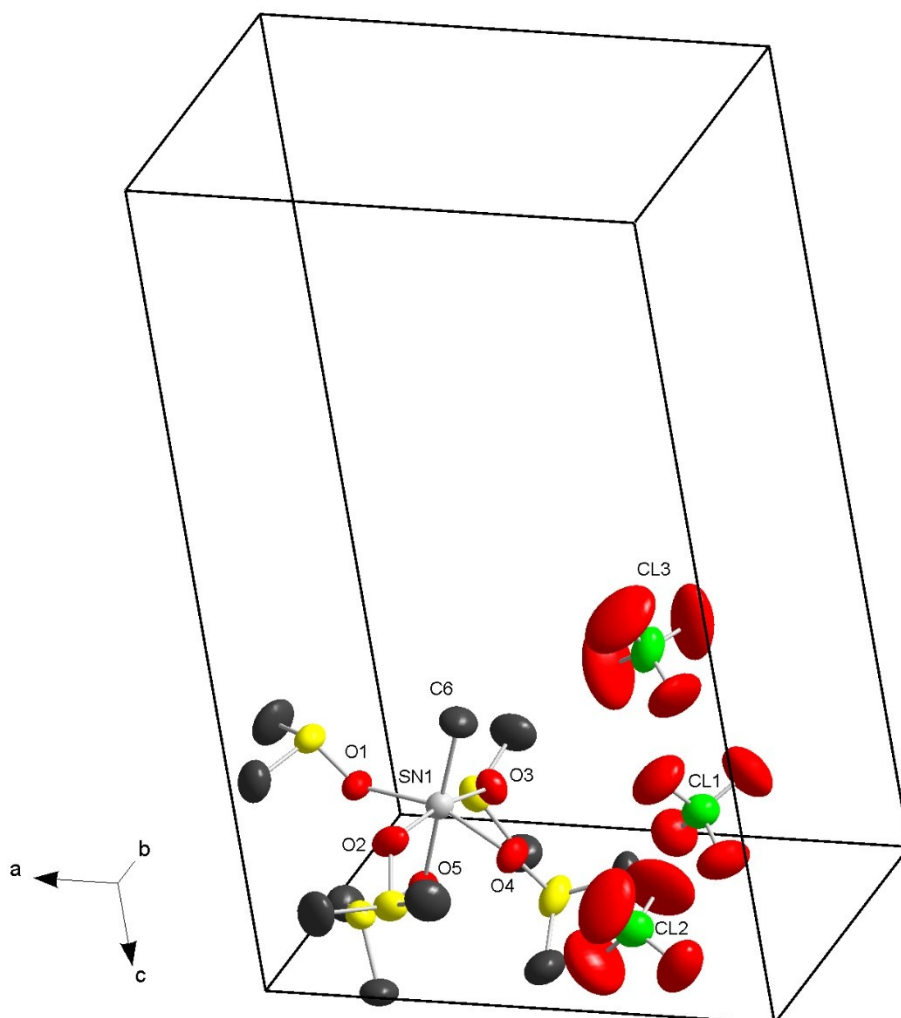

**Figure S2.** Tentative unit cell packing of the  $[\text{Sn}_2(\text{SH})_2(\text{dmtf})_8]^{6+}$  entity in compound **2**. Repeating units are not shown.

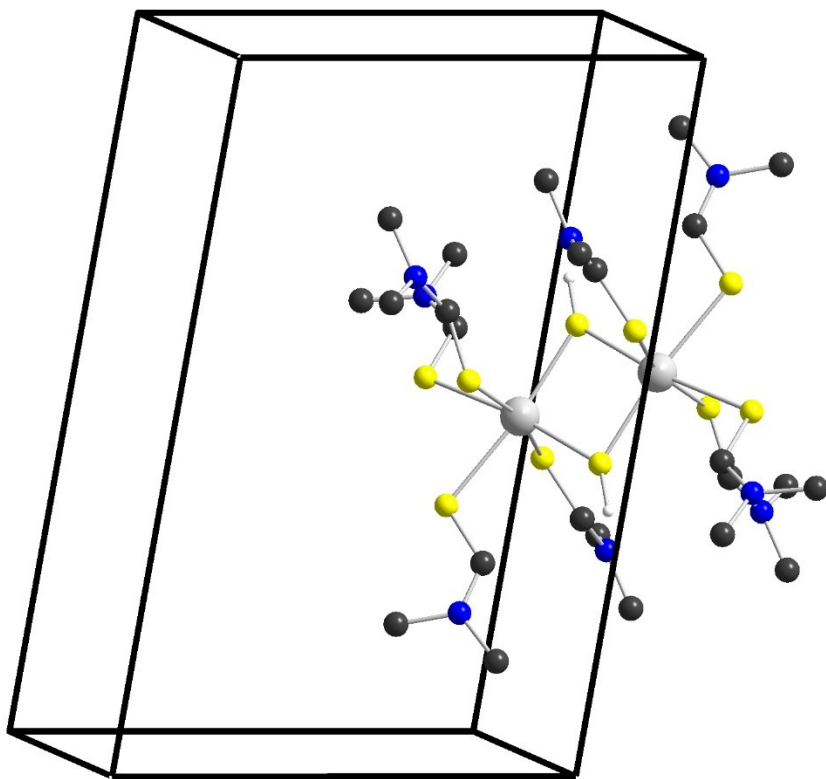

**Figure S3.** The experimental data (black lines) and the corresponding fits (red lines) for solid **1** (bottom; no offset) and its mother liquid (top; offset: 2 units).

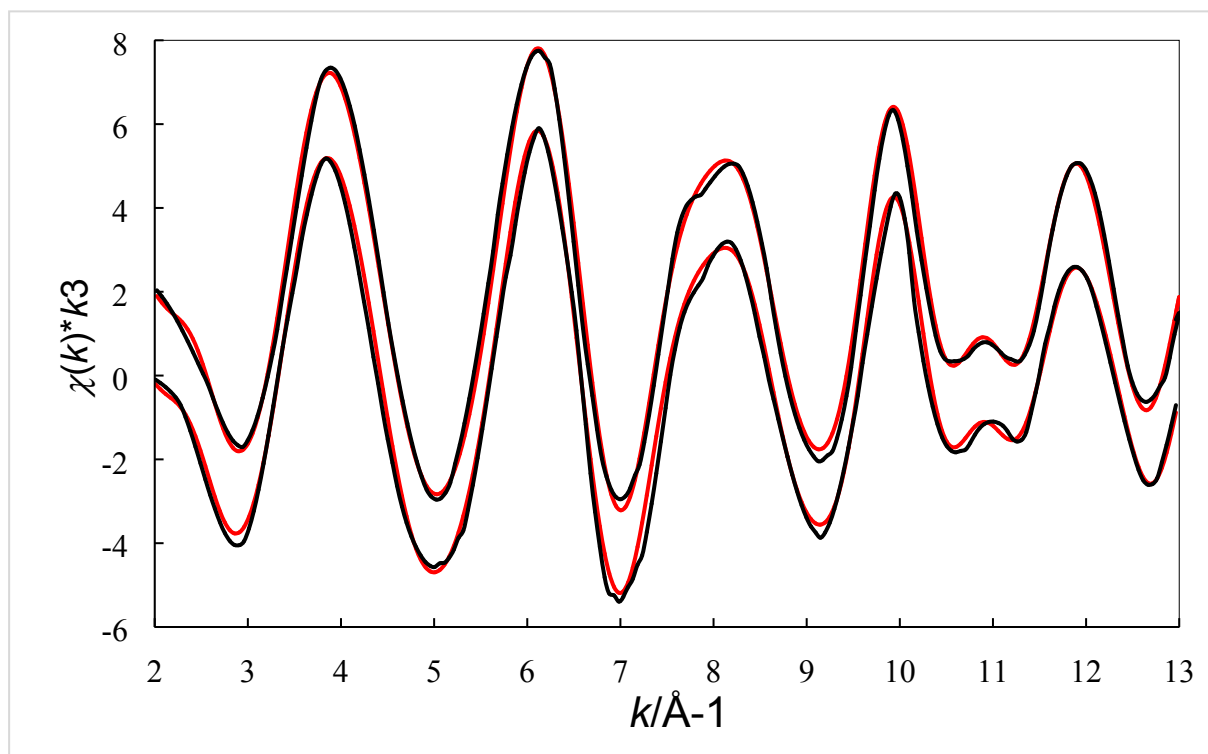

**Figure S4.** The Fourier transforms (FT) of the experimental data (black line) and their corresponding fits for solid **1** (bottom; no offset) and its mother liquid (top; offset: 0.5 units).

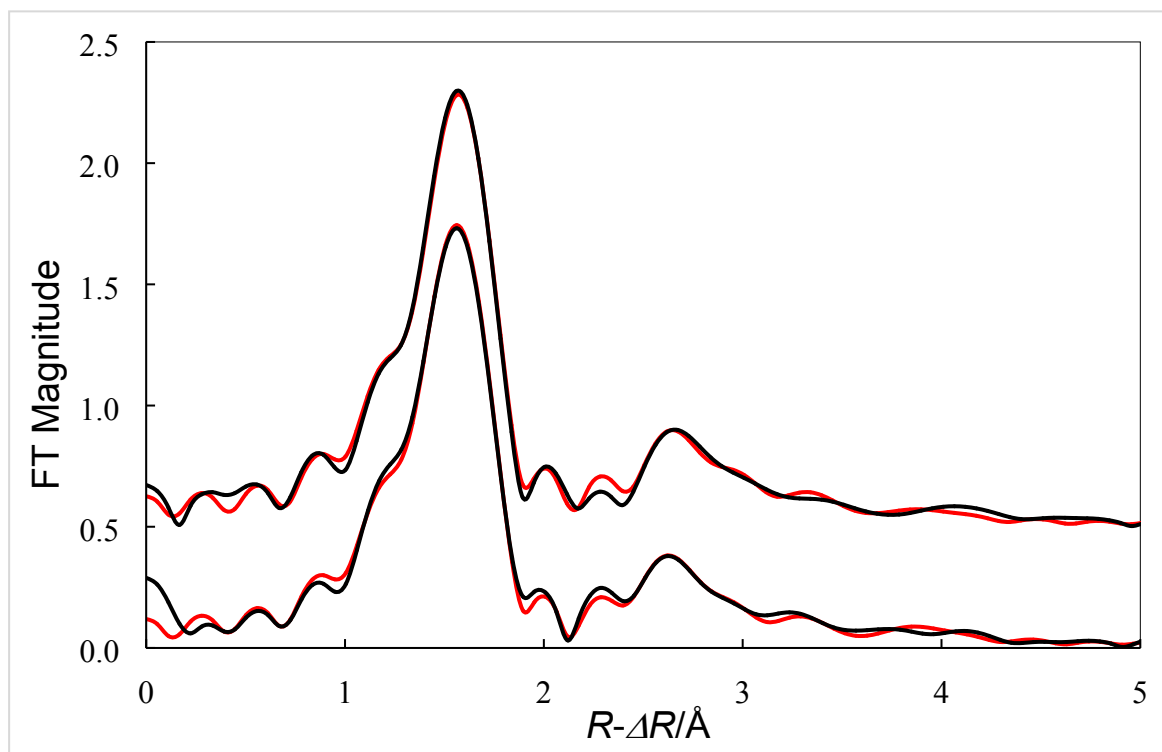

Supplement: c9dt01097a1.pdf [file c9dt01097a1.pdf]
